1 **Patterns of conservation and diversification in the fungal polarization network**

2

3 Eveline T. Diepeveen<sup>1</sup>, Valérie Pourquié<sup>1,2</sup>, Thies Gehrman<sup>2,3</sup>, Thomas Abeel<sup>2,4</sup> & Liedewij

4 Laan<sup>1\*</sup>

5

6 <sup>1</sup>Department of Bionanoscience, Kavli Institute of NanoScience, Faculty of Applied Sciences,

7 Delft University of Technology, P.O. Box 5046, 2600 GA, Delft, the Netherlands

8 <sup>2</sup>Delft Bioinformatics Lab, Faculty of Electrical Engineering, Mathematics and Computer

9 Science, Intelligent Systems, Delft University of Technology, Mekelweg 4, 2628 CD, Delft,

10 the Netherlands

11 <sup>3</sup>Westerdijk Fungal Biodiversity Institute (CBS-KNAW), P.O. Box 85167, 3508 AD, Utrecht,

12 the Netherlands

13 <sup>4</sup>Broad Institute of MIT and Harvard, Genome Sequencing and Analysis Program, 7

14 Cambridge Center, Cambridge, Massachusetts 02142, USA

15 \* Author for Correspondence: Liedewij Laan, Department of Bionanoscience, Kavli Institute

16 of NanoScience, Faculty of Applied Sciences, Delft University of Technology, Delft, the

17 Netherlands, +31 (0)15-2782856, l.laan@tudelft.nl

18

19 **Data Deposition**

20 Sequence alignments used are available upon request.

21

22

23 **Abstract**

24 The combined actions of proteins in networks underlie all fundamental cellular functions.  
25 Deeper insights into the dynamics of network composition across species and their functional  
26 consequences are crucial to fully understand protein network evolution. Large-scale  
27 comparative studies with high phylogenetic resolution are now feasible through the recent rise  
28 in available genomic datasets of both model *and* non-model species. Here we focus on the  
29 polarity network, which is universally essential for cell proliferation and studied in great  
30 detail in the model organism, *Saccharomyces cerevisiae*. We examine 34 proteins, directly  
31 related to cell polarization, across 200 fungal strains/species to determine evolution of the  
32 composition of the network and patterns of conservation and diversification.

33 We observe strong protein conservation for a group of 16 core proteins: 95% of all  
34 strains/species possess at least 75% of these proteins, albeit in varying compositions. We find  
35 high levels of variation in prevalence and sequence identity in the remaining 18 proteins,  
36 resulting in distinct lineage-specific compositions of the network in the majority of  
37 strains/species. We test if the observed diversification in network composition correlates with  
38 potential underlying factors and find that lineage, lifestyle, and genetic distance co-vary with  
39 network size. Yeast, filamentous and basal unicellular fungi form distinctive groups based on  
40 these analyses, with substantial differences to their polarization network. Our study shows  
41 that evolution of the fungal polarization network is highly dynamic, even between closely  
42 related species, and that functional conservation is achieved by varying structural  
43 conservation of the fungal polarization proteins.

44

45 **Keywords**

46 Protein network evolution; Cell polarity; Protein network; Evolution, Fungi; Adaptation.

47

## 48 **Introduction**

49 All cells are maintained through fundamental cellular functions, such as respiration,  
50 biosynthesis, homeostasis and reproduction, that are crucial to the cell's overall existence.  
51 These complex functions are carried out by the combined action of proteins in protein  
52 networks with distinct cellular tasks (Papin et al. 2005; Pawson & Nash 2003). Through  
53 evolution of protein networks, by means of e.g., amino acid mutations, network  
54 expansion/reduction, and interaction effects, diversity is generated that can ultimately lead to  
55 the evolution of new functions (see Gladieux et al. 2014 for a list of reviews). Protein  
56 networks can evolve by changes in network composition, changes in levels of protein  
57 conservation and divergence and changes in expression levels, each with potential functional  
58 consequences (Schüler & Bornberg-Bauer 2010; Voordeckers et al. 2015). Comparative  
59 genomics and/or interaction studies of protein networks, such as the citric-acid cycle (Huynen  
60 et al. 1999), mitotic checkpoint (Vleugel et al. 2012), and the mitogen-activated protein  
61 kinase pathway (Mody et al. 2009) illustrate such patterns. Most of these studies have  
62 examined overall protein network evolution by means of cross kingdom comparisons,  
63 covering ~20 divergent species. Although such approaches are insightful for testing if  
64 proteins are commonly found in distant clades of the tree of life, patterns such as parallel  
65 evolution are difficult to disentangle because of the lack of phylogenetic resolution.  
66 Examining (the factors promoting) protein network evolution in more species, especially at  
67 phylogenetic dense levels, is essential to gain deeper insights into the dynamics of protein  
68 network evolution.

69 What factors promote protein (network) evolution? Numerous factors have been  
70 presented that influence the evolution of individual proteins (see Pál et al. 2006; Zhang &  
71 Yang 2015). To simplify, these factors can be divided into two broad categories: sources of  
72 genetic variation, those relating to regional genomic properties, such as variation in mutation

73 or recombination rate; and selection on genetic variation, factors dependent on specific  
74 protein properties, such as the proportion and distribution of sites that are involved in a  
75 specific functions, protein structure, expression level, and competition or adaptation (Pál et al.  
76 2006). Although there are clear examples to illustrate these individual factors, the factors  
77 often do not act independently, making it hard to identify the relative importance of each  
78 factor. In yeast, for instance, the functional importance of a protein influences the rate of  
79 protein evolution (Wall et al. 2005; Drummond 2005; Hirsh & Fraser 2001), non-essential  
80 genes evolve on average faster than essential genes (Wall et al. 2005), and loci with more  
81 protein-protein interactions evolve on average slower (Jordan et al. 2003). Various studies  
82 have shown that expression rates have the most prominent effect on the rate of protein  
83 evolution (Wall et al. 2005; Drummond 2005).

84         Although selection acts on the outcome of fundamental cellular processes, specifically  
85 the phenotype, there are substantial differences in characteristics of proteins within a single  
86 network. As a consequence, selection can act differently on different proteins in the same  
87 network. For instance, proteins within a network can vary in the number and type of  
88 interactions, the position within the network (e.g., central versus peripheral), and the overall  
89 number of incorporated proteins in the network. Assessing the potential role of these factors,  
90 especially with multi-species comparisons, is crucial for understanding protein network  
91 evolution. Early comparative genomics studies, such as by Huynen *et al.* (Huynen et al.  
92 1999), indicate that protein networks, even those involved in fundamental biological  
93 processes such as energy release by means of the citric-acid cycle, are characterized by  
94 variation in the composition and presence of specific proteins. Protein networks can change  
95 compositions by losing proteins or including novel proteins brought forward, for example  
96 through duplication events through neo- or subfunctionalization (Evlampiev & Isambert  
97 2008; 2007). They can compensate for loss of proteins and new functions can evolve (Schüler

98 & Bornberg-Bauer 2010). By inferring the evolutionary dynamics of protein networks,  
99 various patterns have emerged. Proteins with many interactions in the network ('hub'  
100 proteins) evolve slower than average (Fraser et al. 2002; Kim et al. 2006), especially when  
101 they use multiple binding interfaces (Kim et al. 2006). Interacting proteins evolve at similar  
102 rates (Fraser et al. 2002). Overall, protein networks are characterized by conservation in  
103 topology and function, but also by substantial levels of divergence in network constitution  
104 among species (Liang et al. 2006; Vleugel et al. 2012). Protein networks are thus affected by  
105 a combination of factors, including positive selection, selection on protein function or  
106 structure and drift (Pál et al. 2006).

107         In this paper, we examine a fundamental protein network with the aim to elucidate its  
108 evolution and to identify the factors that contribute to it. We focus on polarity establishment,  
109 a process essential for proliferation in basically all unicellular and multicellular organisms.  
110 Polarity establishment, or the asymmetrical distribution of cellular components, has been  
111 described in great detail in the budding yeast *Saccharomyces cerevisiae* (Chang & Peter 2003;  
112 Martin & Arkowitz 2014; Madhani 2007). To polarize, cells need to break up the symmetrical  
113 distribution of cellular content and self-organize in a polarized way. The small GTPase,  
114 Cdc42, is a central key protein in this process (Etienne-Manneville 2004; Park & Bi 2007;  
115 Johnson 1999). The asymmetrical distribution of so-called polarization proteins, recruited by  
116 Cdc42, determines the site of local growth, or budding in the case of the budding yeast *S.*  
117 *cerevisiae*, which is essential for proper cell division and mating.

118         Cdc42 is a highly conserved protein throughout eukaryotes at both the sequence and  
119 functional level (Johnson 1999; Martin 2015) and its activity is regulated through well-  
120 documented feedback mechanisms (Martin 2015; Goryachev & Pokhilko 2008; Irazoqui et al.  
121 2003; Wedlich-Soldner et al. 2003). The proteins that directly interact with Cdc42 can be  
122 divided into five groups: the GTPase activating proteins (GAPs), that hydrolyze GTP to GDP

123 and change Cdc42 to its inactive state; the guanine nucleotide exchange factors (GEFs), that  
124 catalyze the exchange of GDP for a new GTP molecule which activates Cdc42; the GDP  
125 dissociation inhibitors that extract Cdc42 from the membrane (Rdi1 is the only GDP  
126 dissociation inhibitor in budding yeast (Richman et al. 2004)); proteins involved in regulatory  
127 mechanisms, such as positive feedback (e.g., the scaffold protein Bem1 (Butty et al. 2002));  
128 and a wide range of Cdc42 effector proteins which are activated by the active GTP bound  
129 state of Cdc42 (Figure 1A). Examples of Cdc42 effector proteins are the p21-associated  
130 kinases (PAK) Ste20, Cla4 and Skm1 (Johnson 1999), and the GTPase Interactive  
131 Components Gic1 and Gic2 (Brown et al. 1997). These proteins co-localize with Cdc42  
132 during polarity establishment and form a protein complex by recruiting other proteins that are  
133 needed for proper actin and microtubule polarization (Johnson 1999; Brown et al. 1997; Drees  
134 et al. 2001). Various factors that could influence protein network evolution, such as the  
135 number of genetic and/or physical interactions and expression levels, have been determined  
136 for the proteins in this network in budding yeast (see Figure 1B). We therefore investigate the  
137 protein network evolution of polarization establishment among the ecologically and  
138 genetically highly diverse clade: the Fungi (Galagan et al. 2005; Ebersberger et al. 2012;  
139 Mueller & Schmit 2007).

140 The eukaryote kingdom of fungi is estimated >760 million years old (Lucking et al.  
141 2009) and consists of up to 5.1 million estimated extant species (O'Brien et al. 2005). It  
142 includes an abundance of species with ecological, agricultural, medical and scientific  
143 relevance. Lifestyles can be restricted to a unicellular lifestyle, either yeast-like or non-yeast  
144 as observed in the basal clade of Microsporidia, or multicellular (i.e., filamentous species), or  
145 can consist of different stages, switching between two or more lifestyles (i.e., di-, trimorphic  
146 species). The wealth of different ecologies together with the available genomic and  
147 phenotypic resources and tools, such as the *Saccharomyces* Genome Database

148 (www.yeastgenome.org), make fungi an excellent tool for comparative studies between  
149 ecologically highly diverse, but also relatively closely related species. A vast increase of  
150 available fungal genomic datasets, especially fueled by initiatives such as the Fungal Genome  
151 Initiative (Rhind et al. 2011), the FungiDB (Stajich et al. 2011) and the 1K fungal genomes  
152 project (<http://1000.fungalgenomes.org/home/>; see also Sharma 2016), took place in the last  
153 five years prior to this study and provides the desirable scale of data to reach high  
154 phylogenetic resolution.

155         Although the processes of cell polarity and morphogenesis have been studied  
156 extensively in *S. cerevisiae* (Bi & Park 2012; Chant 1999; Pruyne & Bretscher 2000; Pruyne  
157 et al. 2004; Park & Bi 2007; Drees et al. 2001; Chang & Peter 2003; Martin & Arkowitz  
158 2014; Madhani 2007), it is unknown to what extent the network's topology is conserved  
159 across the fungal phylogeny, mainly because only a small number of divergent species has  
160 been examined, which are characterized by variation in both network composition and  
161 phenotypes (Diepeveen et al.). Due to its fundamental function in cell proliferation, the  
162 polarization protein network is hypothesized to be a conserved system (Chang & Peter 2003;  
163 Pruyne et al. 2004). In fact, several members of the polarization protein network, such as  
164 Cdc42, Cdc24 and Sec15, are found to be essential in *S. cerevisiae* (Liu et al. 2015).  
165 Interestingly, previously we showed that, under laboratory settings, the polarization network  
166 in *S. cerevisiae* is able to adapt to genetic perturbations to one of the core proteins: Bem1,  
167 which regulates Cdc42 (Laan et al. 2015). It is unknown to what extent this represents  
168 adaption under natural conditions. Thus, there is some information available on the  
169 conservation and evolvability (i.e., the ability of a species to evolve adaptive diversity) of a  
170 small number of individual polarization proteins, but a larger screen to quantify the  
171 evolutionary conservation across large phylogenetic distances is currently lacking.

172           Here we take advantage of the (newly) available tools and data in order to untangle  
173 patterns of protein network evolution with high phylogenetic resolution within a single, but  
174 phenotypically diverse kingdom. We aim to elucidate lineage-specific, independently  
175 recurrent and/or conserved patterns of protein network composition, and levels of protein  
176 conservation (i.e., both the presence of the protein in a species and sequence conservation)  
177 and divergence of 34 polarization loci among 200 closely related fungal species. We aim to  
178 elucidate factors involved in evolution of this particular and fundamental protein network.



## 179 **Material and Methods**

### 180 *Focal (non-)polarization protein list and selected strains and species*

181 We selected 34 polarization proteins (see Supplementary File 1, Figure 1) based on described  
182 physical or genetic interaction with the small GTPase, Cdc42, a key regulator of polarization  
183 (Etienne-Manneville 2004; Park & Bi 2007) and/or described functions of the protein in the  
184 polarization network on the Saccharomyces Genome Database (SGD; [www.yeastgenome.org](http://www.yeastgenome.org);  
185 June 2015; Cherry et al. 2011). For each of these proteins we downloaded the amino acid  
186 sequences from the SGD for *Saccharomyces cerevisiae* and used these sequences as reference  
187 or input query in the subsequent analyses (described below).

188 We obtained the full proteomes of 407 available fungal strains and species from  
189 Ensembl Fungi release 27 (June 2015; Supplementary File 1; Kersey et al. 2016) and created  
190 an initial proteome database (PDB) with the BLAST command line applications (version  
191 2.2.31; Neumann et al. 2014). The proteome of *S. cerevisiae* (strain ATCC 204508/S288c)  
192 was downloaded from UniProt ([www.uniprot.org](http://www.uniprot.org)). To perform the phylogenetic and  
193 reciprocal BLAST search analyses in an effective manner, we discarded strains and species  
194 with low quality proteomic data. We ran in-house scripts to determine the ‘optimum’ number  
195 of species that shared an ‘optimum’ number of communal proteins. In short, we calculated the  
196 number of shared proteins across the range of the 407 initial strains and species. We selected  
197 an ‘optimum’ of 200 strains and species (Supplementary File 1) for which we constructed the  
198 final PDB based on their proteomes as described above. The 200 strains and species had 86  
199 proteins in common (Supplementary File 1). Note that these 86 proteins do not include any of  
200 the 34 polarization proteins. These protein sequences were used for the phylogenetic tree  
201 construction. We also constructed a *S. cerevisiae* (S288c) specific PDB for the reciprocal  
202 BLAST analysis.

203

204 *Phylogenetic tree construction*

205 We retrieved the amino acid sequence of the 86 shared proteins (combined length of  
206 49484 aa in *S. cerevisiae*) for the 200 strains and species. Alignments were made for each of  
207 the 86 proteins individually with Clustal Omega 1.2 (Sievers et al. 2011). The total length of  
208 the full alignment was 158856 aa. We performed phylogenetic inference on a single  
209 concatenated data file by means of the approximately maximum likelihood method as  
210 implemented in FastTree (version 2.1.8; Price et al. 2009) with the JTT model of amino acid  
211 evolution (Jones et al. 1992). The tree is mid-point rooted. The tree was visualized and edited  
212 in FigTree v1.4.2 (<http://tree.bio.ed.ac.uk/software/figtree/>). We checked the obtained support  
213 values and only reported them in the phylogeny, when they are < 0.9.

214

215 *Polarization protein conservation matrix*

216 We screened the final PDB (see above) for the presence of the 34 focal polarization  
217 proteins through Reciprocal BLAST searches. We used the *S. cerevisiae* (strain ATCC  
218 204508/S288c) amino acid sequence as input query. This was done to overcome  
219 computational limitations with orthology prediction between the 200 species. Other tools,  
220 such as DIAMOND (Buchfink et al. 2014) may ameliorate computational problems, but will  
221 result in a loss of sensitivity which is required when examining such specific protein  
222 networks. We performed local BLASTP searches without e-value constraints to be able to  
223 find hits, even in highly diverged species. We took the associated protein sequence of all  
224 obtained hits and performed local BLASTP searches again now against the *S. cerevisiae*-  
225 specific PDB, again without e-value constraints. We selected the hit with the best e-value in  
226 the initial BLAST search and called the hit a ‘true match’ only if the same protein ID was  
227 retrieved as the original *S. cerevisiae* query. If there was no match in protein ID between hit  
228 and query, then we called it a ‘no match’. For the ‘true matches’ we corrected the similarity

229 scores (i.e., the number of positive-scoring matches) of the best BLAST hit to the query  
230 protein length of *S. cerevisiae*, thereby obtaining the fraction of similarity per hit. For the ‘no-  
231 matches’ we assigned a similarity score of 0. We generated a matrix of similarity scores by  
232 combining all the obtained scores and organizing them according to the species order as  
233 observed in our constructed phylogeny for each protein. These steps were performed with in-  
234 house python scripts. The generated data matrix was displayed as gray-scale matrix in R  
235 version 3.1.2 (R Core Team 2014).

236 We constructed a separate protein matrix for the group of 36 strains/species with high  
237 genome quality (i.e., for which the number of chromosomes is known and the number of  
238 scaffolds (roughly) equals the number of chromosomes; Supplementary File 1). For these  
239 species high quality genomes are available and therefore, overall genome quality should not  
240 affect our obtained results by means of incomplete genome sequences, and thus the possibility  
241 of absent protein sequences.

242 To determine if there was a group of proteins systematically present in a high number  
243 of species, we plotted the overall prevalence (%) across the 200 strains/species for each  
244 protein. We also plotted the overall prevalence of the two main fungal lineages  
245 Basidiomycota and Ascomycota separately in order to make sure that the proteins were  
246 present in high prevalence in both major clades. We used a 70% cut-off value in both clades  
247 as criteria for high prevalence and call the proteins that meet these criteria the conserved core  
248 of polarization proteins. We based this cut-off value on the observation that there is a gap in  
249 prevalence between 45% and 70% for the full dataset of 200 strains/species, dividing proteins  
250 into two groups. We also plotted the difference in prevalence between the Ascomycota and  
251 the Basidiomycota, to depict proteins that are particularly prevalent in either group.

252

253 *Statistical analyses*

254 We tested for a potential correlation between our obtained pattern of matches (i.e., the total  
255 number of ‘true matches’ per strain/species) and genome quality for which we used two  
256 assembly statistics. We obtained the number of contigs and N50 of contigs (i.e., length of  
257 contigs constituting 50% of the bases in the assembly), the number of scaffolds and the  
258 associated N50 for each of the genomes of the 200 selected strains/species from the European  
259 Nucleotide Archive (<http://www.ebi.ac.uk/ena>; Leinonen et al. 2010). Data was tested for  
260 normality with D’Agostino & Pearson omnibus normality tests as implemented in GraphPad  
261 Prism version 5.0 for Mac OS X (GraphPad Software, La Jolla California USA,  
262 [www.graphpad.com](http://www.graphpad.com)). Correlations were tested with a spearman’s rank correlations as  
263 implemented in GraphPad Prism.

264 We also tested if genome quality affected our obtained results of the full protein  
265 matrix by directly comparing the observed number of proteins per species clade-wise for four  
266 major lineages to the ones of the same lineages in the reduced matrix of 36 species. We used  
267 the Microsporidia, Saccharomycotina and Pezizomycotina lineages because these clades are  
268 also represented by at least 4 individuals in the reduced matrix. We divided the  
269 Saccharomycotina clade into two subclades because we observed distinctive lineage-specific  
270 patterns, such as gains/losses and distinctions in similarity scores, dividing them in two  
271 clades. Saccharomycotina clade 1 represents the Saccharomycetaceae family and the  
272 Saccharomycotina clade 2 includes the Debaryomycetaceae, Pichiaceae and  
273 Phaffomycetaceae families. Data was tested for normality with D’Agostino & Pearson  
274 omnibus normality tests as implemented in GraphPad Prism. We performed a Kruskal-Wallis  
275 test comparing the medians of the two matrices per defined lineage.

276 To test hypotheses about the cause(s) of differences observed in prevalence between  
277 the core and non-core proteins, we tested if these groups of proteins differed in number of  
278 genetic interactions, number of physical interactions and overall abundance of the proteins, as

279 indicative for gene expression level. Data for the number of interactions of the 34 proteins  
280 with other members in the network in *S. cerevisiae* were obtained from SGD. We gathered  
281 information about protein abundance (molecules/cells) in *S. cerevisiae* from Kulak *et al.*  
282 (Kulak et al. 2014). Data was tested for normality with D'Agostino & Pearson omnibus  
283 normality tests as implemented in GraphPad Prism. We also included the prevalence in the  
284 analyses. We performed, a Kruskal-Wallis test (for interactions) and a Mann Whitney tests  
285 (for prevalence and protein abundance) with GraphPad Prism.

286

### 287 *Multiple Factor Analysis*

288 Because we expected multiple continuous and categorical variables to potentially co-vary and  
289 correlate with the observed number of proteins, we performed Multiple Factor Analysis  
290 (MFA) on a dataset of the 200 strains/species. We included the following variables: proteins  
291 (i.e., the total numbers of proteins as observed in the full protein matrix), genome quality (i.e.,  
292 the number of Contigs and N50 of Contigs), Lineage (i.e., the main retrieved phylogenetic  
293 clades: Microsporidia, Cryptomycota, Wallemiomycetes, Pucciniomycotina,  
294 Ustilaginomycotina, Agaricomycotina, Taphrinomycotina, Saccharomycotina (clades 1 and 2,  
295 as defined above), Pezizomycotina), genetic distance (in respect to the reference *S.*  
296 *cerevisiae*), and lifestyle (i.e., unicellular, yeast, filamentous, dimorphic yeast-filamentous,  
297 dimorphic yeast-pseudohyphal, and trimorphic). We calculated the genetic distance between  
298 the examined strains/species and the reference. We used the concatenated amino acid  
299 sequences of the 86 proteins from the phylogenetic analyses (158854 aa; see above) and  
300 calculated the genetic distance by using the JTT model of amino acid evolution in MEGA 7:  
301 Molecular Evolutionary Genetics Analysis version 7.0 for bigger datasets (Kumar et al.  
302 2016). We obtained the lifestyle information from the Fungal Databases of the CBS-KNAW  
303 Fungal Biodiversity Centre (<http://www.cbs.knaw.nl/>) and literature (Nagy et al. 2014;

304 Bastidas & Heitman 2009; Gauthier 2015). We performed the MFA with the FactoMineR R  
305 package version 1.33 (Lê et al. 2008) package in R version 3.3.2 (R Core Team 2014) under  
306 Rcmdr version 2.3-2 (Fox & Bouchet-Valat; Fox 2005; 2016). We used 3 quantitative groups:  
307 genetic distance, genome quality (i.e., 2 variables) and proteins, and two qualitative groups;  
308 lifestyle and lineage. Continuous variables were scaled and standard settings were used. We  
309 first checked the eigenvalues for the first ten dimensions to determine the appropriate number  
310 of dimensions to consider. In particular we checked for a drop in decline in variance (i.e.,  
311 broken stick method; Jackson 1993). Length and directions of continuous variables were  
312 plotted onto the first two dimensions and were visually checked. Partial axes for the first  
313 three dimensions were visually checked. The five groups were plotted onto the first two  
314 dimensions. We plotted individuals onto the first two dimensions and color-coded them  
315 according to lineage.  
316

## 317 **Results**

### 318 *Phylogeny of 200 fungal strains/species is highly supported*

319 In order to examine protein network evolution of fungal polarity establishment, we first  
320 estimated the phylogenetic relationship for our focal species. We inferred the phylogeny by  
321 means of the approximately maximum likelihood method on 86 homologous non-polarization  
322 proteins that these 200 strains/species have in common (see methods for details; total  
323 alignment length: 158,856 amino acids (aa; Figure 2)). Our phylogenetic tree is well-resolved  
324 and highly-supported and includes four main monophyletic phyla: the club fungi and relatives  
325 (Basidiomycota); sac fungi (Ascomycota); and the two basal phyla Cryptomycota and  
326 Microsporidia. Within the Basidiomycota, we found 100% support for the monophyletic  
327 subphyla Ustilaginomycotina, Pucciniomycotina, Agaricomycotina and Wallemiomycetes.  
328 Our observation of a basal position of the Wallemiomycetes species is in accordance with  
329 previous findings (Matheny et al. 2006; Zalar et al. 2005; Hibbett et al. 2007), although its  
330 exact position within the Basidiomycota phylum, and in relation to the Agaricomycotina in  
331 specific, has been varying (Matheny et al. 2006; Padamsee et al. 2012). Within the  
332 Ascomycota, we found full support for the monophyly of the Taphrinomycotina,  
333 Saccharomycotina and the Pezizomycotina, consistent with previous findings (Hibbett et al.  
334 2007; Schoch et al. 2009). A discussion on relationships of deeper braches and clades is,  
335 however, beyond the scope of this work, although we observed almost exclusively high  
336 support values (i.e., >0.9) for the deeper branches and many relationships agree with  
337 previously published work (e.g., Saccharomycotina lineage; Shen et al. 2016).

338

### 339 *Genome incompleteness has little impact on the protein matrix*

340 We constructed a protein matrix consisting of the 34 polarization proteins and 200  
341 strains/species based on our reciprocal BLAST approach (see methods for details). This way

342 we can both determine the presence of a protein in the examined strains/species and, when  
343 present, the level of sequence similarity in respect to *S. cerevisiae*.

344 Our approach resulted in a detailed protein matrix indicating the presence, level of  
345 divergence in respect to *S. cerevisiae*, and absence of the 34 polarization proteins in the  
346 examined strains/species (Figure 2). To determine if the quality of the genomic resources had  
347 an effect on the obtained results, we tested if there was a correlation between the total number  
348 of contigs, the N50 of contigs (i.e., length of contigs constituting 50% of the bases in the  
349 assembly) and the total number of proteins we obtained per strain/species. We observed that  
350 the quality of the 200 selected strains/species' genomic resources was highly variable  
351 (Supplementary File 1). Contig N50 range from 6 kb - 9 Mb. Genomic resources with short  
352 N50 may suffer from missing data such as missing exons and/or gaps (English et al. 2012),  
353 which could include, or result in, missing loci. A recent survey of >200 fungal genomes  
354 indicates that potentially only 40% reach the set cut-off for representative completeness  
355 (Cisse & Stajich). We found weak but significant correlations between the total number of  
356 obtained proteins per species and the number of contigs (Spearman rho = -0.29, P-value < 1.0  
357 x 10<sup>-4</sup>), and the contig N50 (R = 0.32, P-value < 1.0 x 10<sup>-4</sup>; Figure 3). Thus, we potentially  
358 have cases of false negatives, or mismatches, in our protein matrix. In order to examine this  
359 pattern in more detail and to diminish the potential effect of missing proteins on our  
360 reciprocal BLAST analysis, we selected 36 strains/species with the most complete genomes  
361 (i.e., the number of scaffolds roughly equals the number of chromosomes) and constructed a  
362 reduced matrix (Figure 4). We then compared the overall number of observed proteins in the  
363 full matrix with the reduced matrix for all members of four lineages: Microsporidia, two  
364 Saccharomycotina clades, and the Pezizomycotina (Supplementary File 2). We did not  
365 observe significant differences in the number of proteins between the complete matrix and the  
366 reduced matrix (P-value > 0.05 for Microsporidia, Saccharomycotina I, Saccharomycotina II,



367 Pezizomycotina), indicating that the potential effect of missing data in our full matrix is, if  
368 any, minimal. Next, we examine the reduced matrix for patterns of protein conservation and  
369 divergence and compare them to the original matrix in order to test their generality.

370

371 *The polarization protein network is dynamic and has a conserved core*

372 To examine the fungal polarization network for patterns of protein network evolution, we  
373 screened the protein matrices for variation in protein prevalence (i.e., the overall number of  
374 species a protein is present in), levels of protein divergence and the repertoire of proteins (i.e.,  
375 the composition of polarization network per species). We observed variation in the  
376 polarization network at different levels and magnitudes. We observed great variation at the  
377 level of amino acid similarity between different proteins, across different strains/species and  
378 between different lineages (Figure 4, Figure 2). For instance, Cdc42 is present with high  
379 levels of similarity in all species except in the Microsporidia, where it is not present in any of  
380 the examined species. Cla4, Ste20 and Cdc24 are found throughout the phylogeny as well, but  
381 their similarity scores vary greatly across species. These patterns were observed both in full  
382 and reduced matrices.

383       Next we examined the variability of the composition of the polarization protein  
384 repertoire between strains/species. We assessed the overall number of different protein  
385 combinations and the total number of unique repertoires across the reduced matrix (36  
386 strains/species) and the full matrix (200 strains/species). We observed nearly identical  
387 fractions for the total number of different protein repertoires for the two matrices (i.e., 28/36  
388 and 155/200). This indicates that the composition of repertoire is highly variable, with many  
389 different observed combinations of proteins. For both matrices the overall fraction of unique  
390 repertoires (i.e., protein repertoires observed in a single species) was also very similar, 0.64  
391 (reduced matrix) and 0.67 (full matrix). We thus find that the majority of species are

392 characterized by a unique set of polarization proteins not found in other species. Interestingly,  
393 we observed several specific combinations multiple times. For instance, we observed the  
394 same pattern for all 7 Microsporidia species (Iqg1 and Ubi4). We observed most cases of  
395 repeated repertoires in the species-rich and well-covered lineages Pezizomycotina (113  
396 species in the full matrix) and Saccharomycotina lineages (20 species in the reduced matrix)  
397 (Supplementary File 3). These combinations include prevalent and functionally diverse  
398 proteins such as Rdi1, Bem1/2/3, Bni1, Axl2, Cla4, Ste20, Sec3/4/15, and Msb1/3.

399 To examine the overall prevalence of each protein across the 200 strains/species in  
400 more detail, we screened the full matrix (Figure 5). We observed 23 proteins that were present  
401 in  $\geq 70\%$  of all examined species (e.g., Iqg1), seven proteins are more commonly found in the  
402 Basidiomycota (e.g., Bem2), and four proteins restricted to the Ascomycota (e.g., the paralogs  
403 Msb3, Gic1 and Gic2). Most proteins are highest prevalent in the Ascomycota (Figure 5 top  
404 panel). We observed a perceived threshold at  $\sim 60\%$  prevalence for proteins across all species  
405 examined that clearly divided the dataset (Figure 5). We found 11 proteins that are present in  
406 less than 45% of the 200 strains/species, while the other 23 proteins are present in at least  
407 70%. We used this 70% mark as cut-off value to determine conserved proteins (i.e., based on  
408 prevalence) in both Ascomycota and Basidiomycota, individually. Using this, we excluded  
409 those proteins that are more or less Ascomycota-specific, such as Nrp1. We observed the  
410 following 16 proteins in high prevalence in both Ascomycota and Basidiomycota: Cla4, Axl2,  
411 Rho3, Boi2, Ste20, Sec4, Bni1, Bem3, Spa2, Cdc24, Sec15, Ubi4, Bem1, Cdc42, Rdi1 and  
412 Iqg1. We called these proteins the conserved core of polarization across fungi. We found this  
413 full repertoire of core proteins in 66 out of 200 strains/species and  $>95\%$  of all strains/species  
414 had a protein network consisting of 12 or more core proteins (Supplementary File 3).

415

416 *Core proteins have higher protein abundance but not more interactions.*

417 As we observed a group of proteins at high prevalence across clades, we tested if there is a  
418 correlation between this conserved core of proteins and factors known to influence protein  
419 (network) evolution, such as number of protein-protein interactions and expression levels. We  
420 thus tested the following hypothesis: core proteins are conserved because they are either  
421 functionally important and/or because they are present in high quantity.

422 Core proteins had higher prevalence than non-core proteins (Figure 6A). We found no  
423 significant difference in the number of either genetic or physical interactions (based on  
424 observations in *S. cerevisiae*) between the core proteins and the non-core proteins (Figure  
425 6B). We did find a barely significant difference in protein abundance (as measured as  
426 molecules per cell in *S. cerevisiae*; Kulak et al. 2014) between the core proteins and non-core  
427 proteins ( $p=0.03$ ; Figure 6B). Core proteins have higher protein abundance than non-core  
428 proteins.

429

#### 430 *Lineage, lifestyle and genetic distance co-vary with protein network size*

431 In order to characterize the 200 strains/species by different factors that could influence protein  
432 network evolution and in specific could correlate with the observed patterns of differences in  
433 overall number of polarization proteins, we performed Multiple Factor Analysis. We  
434 considered the following factors: size of protein repertoire (i.e., the total number of proteins  
435 we detected with the Reciprocal BLAST search per strain/species), lifestyle, lineage, genome  
436 quality (i.e., the number of contigs and the N50) and genetic distance to the reference *S.*  
437 *cerevisiae*, based on 86 shared proteins.

438 To determine the adequate number of dimensions to screen, we used the broken stick  
439 method (Jackson 1993). We found a drop in variance after the third dimension  
440 (Supplementary File 4), therefore we only considered the first three dimensions. Dimension 1  
441 is constructed based on four groups: lineage (contribution is 27.44%), lifestyle (24.72%),

442 genetic distance (23.39%) and proteins (23.23%). Dimension 2 and 3 are both based on  
443 lineage (44.16%; 50.61%) and lifestyle (43.87%; 46.31%). Together these three dimensions  
444 accounted for 40.70% of the variance in the data. Dimension 1 explained 20.28%, dimension  
445 2 12.37% and dimension 3 8.06% (Figure 7D). We did not find a substantial (>0.5)  
446 contribution of genome quality, indicating that the number of contigs and/or N50 of contigs  
447 did not explain the variation in the protein repertoire and other examined factors.  
448 Supplementary File 4B shows that lifestyle and lineage vary together and that they vary  
449 together with protein repertoire and genetic distance. Supplementary Files 4C & 4D indicate  
450 that protein repertoire and genetic distance only correlate with dimension 1, while lineage and  
451 lifestyle also correlate with dimensions 2 and 3.

452 We plotted the 200 strains/species onto the first two dimensions to visually examine if  
453 they cluster to specific patterns based on e.g., morphology or descent (Figure 7A). As four  
454 factors mainly contributed to the axes, various patterns were observed. Overall, prevalence  
455 (proteins) declined horizontally (from left to right), with an increase in genetic distance.  
456 Lineage and lifestyle contributed to both axes, and a clear distinction could be made between  
457 three main clouds of individuals according to their morphology: the top left corner represents  
458 the yeast-like fungi, the top right corner represents the unicellular non-yeast-like fungi, and  
459 the lower center represents the filamentous fungi. The yeast-like fungi mainly constituted out  
460 of the yeast and dimorphic (Y/P) lifestyles, while the lineages that mostly consist of the  
461 filamentous lifestyle were found in the bottom center cloud (Figure 7C). We observed a split  
462 in the Ustilaginomycotina species, as two species are yeast-like and two species are  
463 filamentous. Interestingly, the Ascomycotan and mostly filamentous Pezizomycotina  
464 clustered together with the Basidiomycotan individuals in the filamentous group. This  
465 observation is not in line with the phylogenetic relationships between these clades, but it does  
466 indicate that variation in the factor lifestyle is more similar for the Pezizomycotina and the

467 Basidiomycotan species, as opposed to the Pezizomycotina and other Ascomycotan species.  
468 We observed similar patterns when we examined these factors individually versus the protein  
469 repertoire (Figure 7E-G). Our results suggest that the Basidiomycota and the filamentous  
470 Ascomycotan species have a smaller repertoire than the yeast-like Ascomycota, and that the  
471 two basal lineages have an even smaller repertoire (Figure 7E). Lastly, we did observe a  
472 pattern of decreasing number of polarization proteins with greater genetic distance to our  
473 reference *S. cerevisiae* (Figure 7G).

## 474 **Discussion**

475 Here we assess evolution of the fungal polarization network at high phylogenetic resolution to  
476 examine patterns of lineage-specific, independently recurrent and/or conserved patterns of  
477 protein network composition along with levels of protein divergence. We observe that the  
478 fungal polarization protein network is characterized by both strong protein conservation *and*  
479 variation in protein prevalence and sequence similarity. Our results indicate that while certain  
480 proteins are nearly always needed potentially for specific functions (i.e., functional  
481 conservation), various other functional steps seem to be fulfilled by a variable repertoire,  
482 indicating flexibility in the network composition. Below, we discuss these observations in  
483 context of protein network dynamics, functionality of the protein network, and potential  
484 causal factors of protein network evolution.

485

486 *The fungal polarization network is highly variable at lineage-specific levels*

487 It is clear that protein network evolution has a variety of outcomes, such as network  
488 expansion/reductions, interaction effects and protein divergence (Schüler & Bornberg-Bauer  
489 2010; Voordeckers et al. 2015), brought forward by e.g., gen(om)e duplication, selection on  
490 protein function or structure and drift (Pál et al. 2006). We found that most proteins of the  
491 polarization network have high levels of divergence in amino acid sequence across fungi and  
492 that the specific build up of the protein repertoire per strains/species is highly variable. We  
493 find both variation at large phylogenetic distances, such as between subphyla, and between  
494 strains/species of the same clade. This indicates that, although the polarization network is  
495 involved in fundamental cellular functions across organisms, the network, as we know that in  
496 *S. cerevisiae*, is not a conserved entity. Work based on the first available fungal genomes  
497 reveal remarkable levels of divergence (Galagan et al. 2005), with even less than 50%  
498 similarity in amino acid sequence in comparisons of Ascomycotan species (Dean et al. 2005).

499 Screening these genomes for networks reveal that especially regulatory pathways are  
500 recurrently characterized by substantial levels of variation, in that elements can be gained or  
501 lost over time (Tanay et al. 2005; Muñoz et al. 2016; Tuch et al. 2008; Habib et al. 2012). Our  
502 work provides further support for the eminent finding that proteomes and networks constantly  
503 change (Coulombe-Huntington & Xia 2017), not only in Ascomycota as previously shown,  
504 but also in Basidiomycota and basal lineages as Cryptomycota and Microsporidia.

505         The substantial levels of variation that we observed in the polarization network could  
506 be caused by the remarkable differences in how fungal species polarize and grow (e.g.,  
507 isotropic, (a)symmetric). In fact, we do find a clear clustering of yeast-like fungi, non-yeast  
508 like unicellular fungi and filamentous fungi in our MFA plot. While budding yeast polarizes  
509 in a switch-like way, filamentous species are characterized by continuous hyphal growth and  
510 thus need a constant state of polarity. Differences at the protein levels between species with  
511 differences in polarization/growth mode have also been described. The Rho GTPase Rac1 has  
512 partly overlapping functions with Cdc42 in regulating polarization in a variety of filamentous  
513 species (Banuett et al. 2008), but not in *S. cerevisiae*. We believe that the observed levels of  
514 variation have a strong functional component.

515         To what extent does this high variability of the protein network affect functionality?  
516 As functional studies are not available for the majority of examined species, we made use of  
517 the functional classification of proteins of *S. cerevisiae* (see Figure 1). We found that over  
518 90% of examined strains/species have at least one protein present from all nine defined  
519 functional groups. This could imply that the overall functional pathway of polarity  
520 establishment, by means of the regulation of Cdc42, is similar across the fungal tree.  
521 Exceptions to this overall pattern of consensus are observed throughout the tree (e.g.,  
522 Microsporidia, *Penicillium rubens*, *Suillus luteus*, *Serpula lacrymans*, lacking e.g., Cdc42

523 effectors and/or GEF proteins). Further functional exploration of protein networks in  
524 additional non-model species is needed to determine the level of orthology of these networks.

525

526 *Variation in polarization network; from stark reductions to lineage-specific additions*

527 We found high levels of lineage-specific patterns, of which various patterns coinciding with  
528 monophyletic clades. For instance, Msb3 and Axl2 are individually lost in various  
529 Pezizomycotina clades (Figure 2). The protein matrix also showed very similar patterns for  
530 the four Taphrinomycotina species, which are quite dissimilar from the other Ascomycota  
531 clades. These species have very distinct ecologies, as they are the only fission yeast species.  
532 We do observe further cases of lineage-specific patterns in clades with distinct ecologies.

533 We found that nearly all examined polarization proteins were absent in the  
534 Microsporidia (Figure 2), including most of the conserved core. The only proteins that we  
535 observed are Iqg1 and Ubi4. Interestingly, we did not observe this pattern in the other basal  
536 phylum, the Cryptomycota. We believe that our observation is a true lineage-specific loss in  
537 the Microsporidia, as the majority of the polarization proteins (29 out of 34 proteins) are  
538 found in non-fungal eukaryotes, such as animals, amoeba and/or plants (see Supplementary  
539 File 5). The genomes of the parasitic Microsporidia are known to be highly condensed and  
540 lack other essential proteins, such as MAP kinases and proteins involved in stress response  
541 (Miranda-Saavedra et al. 2007; Peyretailade et al. 2011; Vivarès et al. 2002). This strong  
542 reduction in the proteome is hypothesized as an adaptation to their parasitic life style. It is  
543 currently not understood which proteins play a role in polarized cell growth in this genus.

544 In contrast to the strong reduction in the Microsporidia, we observed lineage-specific  
545 gain of polarization proteins in the budding yeast species Saccharomycetaceae. Bem4, Gic1  
546 and Gic2 are all restricted to this clade (Figure 2). Various causes can be involved. Genome-  
547 wide comparisons across the eukaryote tree have identified an increase in proteins domains in



548 the lineage towards the Ascomycota (Zmasek & Godzik 2011). Furthermore, a whole genome  
549 duplication occurred in the *Saccharomyces* lineage after the divergence from the  
550 *Kluyveromyces* lineage, and has resulted in many duplicated genes (i.e., paralogs) and  
551 instances of accelerated evolution (Kellis et al. 2004; Wolfe & Shields 1997). Our results  
552 indicate that different processes have resulted in a myriad of lineage-specific patterns across  
553 the fungal tree.

554

### 555 *The conserved core of polarization; functional versus structural conservation*

556 We observe a group of sixteen core proteins that are recurrently present in the vast majority of  
557 examined species (Figure 5). Interestingly, the 16 core proteins cover all functional groups  
558 from Cdc42 regulators and effectors to proteins involved in cytokinesis and exocytosis  
559 (Figure 1). Even though this group consists of the most prevalent polarization proteins, it does  
560 not represent the absolute minimal system needed for polarization. In fact, the majority of  
561 species does not have the full set of core proteins (i.e., the complete core is present in 66 out  
562 of the 200 strains/species), which can be seen as another indicator of high uniqueness of  
563 structural constitution of the polarization network across fungi. Different strains/species might  
564 achieve functional conservation of the core functions of the network by having different  
565 combinations of core proteins. In fact, we observed 12 or more core proteins (i.e., 75%) in  
566 191 strains/species (i.e., 95,5%). These results suggest that functional conservation of the  
567 polarization network is high, but that structural conservation, in the sense of network  
568 composition, of the individual proteins varies across the fungal strains/species.

569 Various protein characteristics have been elucidated that are (in part) responsible for  
570 protein network conservation, such as position within the network, whether the proteins are  
571 essential and the number of interactions (Liu et al. 2015; Giaever et al. 2002). We observed  
572 high proportions of essential proteins (6 out of 7 essential proteins are core proteins) and short

573 single domain proteins (5 out of 10) for the core proteins (Figure 2). Selection is thought to be  
574 strong on these classes of proteins, because of their crucial functions and long protein  
575 domains (Pál et al. 2006; Buljan & Bateman 2009). These functional characteristics are based  
576 on studies in *S. cerevisiae* and could be less relevant in other species. We did not find  
577 significant differences in the number of genetic and physical interactions between the  
578 conserved core proteins and the non-core proteins. Interestingly, Cdc42, Bem1, Cdc24 and  
579 Cla4 were among the conserved core and have the most interactions with the other proteins.  
580 These proteins also take central parts in the polarization network, as key regulator (Cdc42;  
581 Etienne-Manneville 2004; Park & Bi 2007; Johnson 1999), scaffolding for protein complex  
582 (Cdc24 and Bem1; Butty et al. 2002), and signal transducing (Cla4; Johnson 1999). At the  
583 same time, we do find a low number of physical and genetic interactions for the core proteins,  
584 Rdi1, Axl2, Rho3. Our results indicate that factors like if a protein is essential and the number  
585 of interactions, only partially explain the conservation of core proteins. We did find a  
586 significant effect of protein abundance on the conservation of core proteins. This observation  
587 supports the hypothesis that conserved proteins are generally more expressed in a cell, as  
588 discussed previously (Wall et al. 2005; Drummond 2005).

589

#### 590 *Link to causal factors for variation in the polarization protein network*

591 Here we aim to uncover potential causal factors influencing protein network evolution, in the  
592 sense of network size. Our MFA results show that the factors lifestyles, lineage and genetic  
593 distance co-vary with the size of the protein repertoire. These results indicate that the  
594 evolutionary background, adaptation to specific lifestyles (i.e., yeast-like, unicellular and  
595 filamentous) and evolutionary time, and thus an indirect measure of genetic drift, of a given  
596 species influence their polarization repertoire size. The examined factors do not explain all  
597 variation observed in the data, as 59% is undefined, indicative of missing causal factors. The

598 discovery of, and interplay of, causal factors of adaptation and differentiation between species  
599 has gained much and long-term attention in the literature (Kimura 1967; Haldane 1927; Orr  
600 2005; Masel 2011; Futuyma 2009). The long-lasting history of population genetics has shown  
601 that genetic variation, and thus sequence similarity and ultimately presence/absence of  
602 proteins, is caused by the interplay of mutation, natural selection, drift and gene flow, with  
603 descent and thus the heritable characteristics as the starting conditions. It is clear that not all  
604 these potential causal factors are incorporated in our study, mainly due to the scale of our  
605 study and the unavailability of the particular data for our focal species. Even though our  
606 analysis does not examine all factors that are likely to have played a role during the protein  
607 network evolution, we identified several factors that are, in part, responsible for the complex  
608 and highly dynamic polarization protein network evolution of fungi. Further expansion of  
609 experimental datasets and development of reliable large-scale comparative tools, should aid a  
610 better assessment of empirical data in light of the available theoretical models to study the full  
611 scope of real life protein network evolution.

612  
613 Our study characterizes the fungal polarization protein network as highly dynamic  
614 across species, and we identify gene expression level, lineage, lifestyle and genetic drift, as  
615 factors correlating with the observed patterns of variation and adaptation. Our results provide  
616 further evidence that protein networks are often characterized by shared (ancient) conserved  
617 components as well as taxa-specific components that are variable between even closely  
618 related species. Our work sheds new light on the level and intensity of protein network  
619 evolution across broad and deep phylogenetic levels.

## 620 **Acknowledgements**

621 We want to thank the members of the Laan Lab for providing critical feedback during earlier  
622 phases of this project. Thanks to W.K.G. Daalman for advice on the statistical analyses. We  
623 would like to express our gratitude to the participants of the Gordon Research Conference on  
624 Cellular & Molecular Fungal Biology 2016 for constructive feedback on this project. Special  
625 thanks to Q. A. Justman, P. J. Boyton and E. M. Hyland for providing valuable comments on  
626 earlier drafts of this manuscript and to S.W.M. Pelders for assisting with writing python code.  
627 This work was supported by the Netherlands Organization for Scientific Research  
628 (NWO/OCW), as part of the Frontiers of Nanoscience program.

629

## 630 **Competing interests**

631 The authors declare to have no competing interests.

632

## 633 **Supplementary Files**

634 Supplementary File 1. Proteins, Strains & Species information

635 Supplementary File 2. Protein Matrix Comparison 200 versus 36sp

636 Comparison of number of observed proteins between the full dataset of 200  
637 strains/species and the 36 selected species with highest genome quality. Depicted are  
638 scatterplots for the following four lineages: Microsporidia (far left, squares),  
639 Saccharomycotina 1 representing the Saccharomycetaceae family (center left, circles),  
640 Saccharomycotina 2 representing e.g., the Debaryomycetaceae family (center right,  
641 triangles), Pezizomycotina (far right, diamonds). For each lineage a scatterplot of the  
642 full dataset (200 strains/species; right scatterplots) and the reduced dataset is depicted  
643 (36 species; left scatterplots). Lineages are color-coded as in Figure 4A. Medians  
644 (shown as grey lines) do not differ between the two datasets for all four lineages.

- 645        Supplementary File 3. Repeated Combinations Proteins
- 646        Supplementary File 4. MFA analysis
- 647            (A) Broken stick method. (B) Groups. (C) Correlation map of variables. (D) Partial
- 648            axes.
- 649        Supplementary File 5. Eukaryote outgroups
- 650

## 651 **Figure Legends**

652 Fig. 1. The central part of budding yeast's polarization protein network. (A) Polarity  
653 establishment and subsequent budding takes place at one side of the budding yeast cell  
654 (cartoon). Insert: schematic overview of the 34 selected proteins and their functional  
655 groupings based on SGD; <http://www.yeastgenome.org/>, (Drees et al. 2001; Chang &  
656 Peter 2003; Martin & Arkowitz 2014; Madhani 2007). Cdc42 cycles between an  
657 active membrane-bound state (GTP) and an inactive cytosolic state (GDP). Depicted  
658 are the Cdc42 regulators and effectors, the Bem1/Cdc42 protein complex and several  
659 downstream steps. Nrp1 has a presumed function in polarity establishment (see Laan  
660 et al. 2015), Ubi4 has a described epistatic interaction with Cdc42 (BioGRID;  
661 [thebiogrid.org](http://thebiogrid.org)). (B) Matrix of the genetic (in red) and physical (in black) interactions  
662 between the 34 selected polarization proteins based on SGD protein data. Proteins are  
663 color coded with the functional groupings from the (A) panel. Protein Abundance  
664 following Kulak et al. 2014 is displayed in the most right panel. Note that for Gic1  
665 and Ubi4 no expression data was available.

666 Fig. 2. Phylogenetic relationships between the 200 fungal strains/species and the protein  
667 matrix for the 34 selected polarization proteins. The phylogeny is based on 86 protein  
668 sequences (158856 aa) and we used the approximately maximum likelihood method  
669 and the JTT model of amino acid evolution. Support values are almost exclusively  
670 above 0.9, except when shown on the tree (12 instances). The tree includes the phyla:  
671 Microsporidia (in orange), Cryptomycota (in yellow), Basidiomycota (in blue) and the  
672 Ascomycota (in purple). Subphyla are shades of the same phylum color. Phylogenetic  
673 relationships greatly follow known relationships (Matheny et al. 2006; Zalar et al.  
674 2005; Hibbett et al. 2007; Schoch et al. 2009; Shen et al. 2016). The protein matrix  
675 displays the similarity scores of the reciprocal BLAST search. White fields represent

676 no match of the query protein in the respective PDB; black field represent a match  
677 with 100% similarity score; grey fields represent a match with <100% similarity score.  
678 Proteins are ordered and color coded following Figure 1A. Essential proteins (in *S.*  
679 *cerevisiae*), paralogs and short single domain proteins are labeled with green, pink and  
680 yellow bullets at the bottom of the matrix. Various recurrent and lineage-specific  
681 patterns, as discussed in the main text, are highlighted by red outlines. Genome quality  
682 as in number of contigs is shown in the most right column, followed by the life styles  
683 of the fungal species (cartoons: yeast-like (orange), non-yeast-like unicellular (green),  
684 pseudohyphal (light brown), filamentous (dark brown)).

685 Fig. 3. Correlation between genome quality and number of retrieved proteins. The top  
686 panel (Count) shows the distribution of strains/species for the number of retrieved  
687 proteins. The center panel shows a statistically significant positive correlation between  
688 the N50 of contigs of the genome and the number of retrieved proteins. One data point  
689 ( $x=11, y=9.5 \times 10^6$ ) was omitted from the plot for clarity of the plot. The bottom panel  
690 shows statistically significant negative correlation between the number of contigs in  
691 the genome and the number of retrieved proteins. One data point ( $x=12, y=25607$ ) was  
692 omitted from the plot for clarity of the plot.

693 Fig. 4. Protein matrix of the 36 species with highest genome quality. The matrix displays  
694 the similarity scores of the reciprocal BLAST search for species of the Microsporidia  
695 (in orange), Basidiomycota (in blue) and the Ascomycota (in purple). The cladogram  
696 on the left represents the phylogenetic relationship between strains/strains based on  
697 Figure 2 (note: the branch lengths are fixed and do not represent amino acid  
698 substitutions). Proteins are ordered and color coded following Figure 1A. Essential  
699 proteins (in *S. cerevisiae*), paralogs and short single domain proteins are labeled with

700 green, pink and yellow bullets at the bottom of the matrix. The life styles of the  
701 species are depicted on the right column.

702 Fig. 5. Polarization proteins prevalence. Prevalence of the 34 polarization proteins for all  
703 examined fungal species (black circles), the Basidiomycota species (blue circles) and  
704 the Ascomycota species (purple circles). Proteins are ordered based on their overall  
705 prevalence in all examined strains/species. The 70% criterion is marked by a  
706 horizontal red dotted line. Shading in the bottom part reflects grouping of proteins  
707 with < 70% prevalence in all strains/species (light grey; left), proteins with prevalence  
708 > 70%, but prevalence in the Basidiomycota is not in all cases >70% (grey; center),  
709 proteins with >70% prevalence in all examined groups (i.e., core proteins; dark grey;  
710 right). Core proteins in the middle group are marked by an asterisk (\*). Difference in  
711 prevalence between the Ascomycota and Basidiomycota is presented in the top panel  
712 (pink diamonds).

713 Fig. 6. Comparison between the core and non-core proteins. (A) Significant difference in  
714 the observed prevalence of the core and non-core proteins (P-value < 0.0001). (B)  
715 Number of genetic interactions (in red) and physical interactions (in black) between  
716 the 34 examined polarization proteins. No difference was observed between the core  
717 and non-core proteins in the number of genetic or physical interactions. Data was  
718 obtained from SGD protein data. (C) Significant difference in protein abundance  
719 between the two groups. Core proteins have higher protein abundance (P-value =  
720 0.03). Note that data for Gic1 (non-core) and Ubi4 (core) was unavailable. Core  
721 proteins are depicted as circles, while non-core proteins are depicted as squares. Grey  
722 lines depict medians.

723 Fig. 7. Multiple Factor Analysis and correlations. (A) Multiple Factor Analysis of the  
724 number of polarization proteins, lineage, lifestyle, genomic quality and genetic



725 distance. The 200 strains/species are plotted and color-coded according to their  
726 phylogenetic lineage as in Figure 2. Dimension 1 explains 20.28% of the observed  
727 variation and the following four factors constitute to its construction (in order of  
728 importance): lineage, lifestyle, genetic distance, number of observed proteins.  
729 Dimension 2 explains 12.37% of the variation in the data and is based on the variables  
730 lineage and lifestyle. Main areas occupied by specific lineages are labeled accordingly  
731 for clarity. A clear distinction can be made between yeast-like fungi (left top corner),  
732 filamentous fungi (center lower part) and unicellular non-yeast like fungi (right top  
733 corner). (B) Cartoon depicting the topology of the major clades. Note that the two  
734 Saccharomycotina lineages are shown together. The length of branches do not  
735 represent observed branch lengths. See Figure 2 for full phylogeny. (C) The  
736 distribution of lifestyles (in percentages) for the ten different phylogenetic lineages.  
737 The number of strains/species per lineages is given. Lifestyles are color-coded as in  
738 legend at the bottom right of the figure. The 200 strains/species are classified as  
739 unicellular, yeast, filamentous, dimorphic (either yeast/filamentous or  
740 yeast/pseudohyphal) and trimorphic following Figure 2. (D) Pie plot depicting the  
741 percentage of variation explained by the three main dimensions. The three dimensions  
742 account for 41% of the observed variation, leaving 59% undefined. (E) The number of  
743 observed proteins in ten different phylogenetic lineages. Groups are color-coded per  
744 lineage as in Figure 2. Medians are given as grey lines. (F) The number observed  
745 proteins in the different lifestyles. Grey lines represent medians. (G) The number of  
746 observed proteins plotted versus the genetic distance (in respect to *S. cerevisiae*).  
747 Strains/species are color-coded according to their lifestyle morphology.  
748

749 **References**

- 750 Banuett F, Quintanilla RH Jr, Reynaga-Peña CG. 2008. The machinery for cell polarity, cell  
751 morphogenesis, and the cytoskeleton in the Basidiomycete fungus *Ustilago maydis*—A  
752 survey of the genome sequence. *Fungal Genetics and Biology*. 45:S3–S14. doi:  
753 10.1016/j.fgb.2008.05.012.
- 754 Bastidas RJ, Heitman J. 2009. Trimorphic stepping stones pave the way to fungal virulence.  
755 *Proc. Natl. Acad. Sci. U.S.A.* 106:351–352. doi: 10.1073/pnas.0811994106.
- 756 Bi E, Park HO. 2012. Cell Polarization and Cytokinesis in Budding Yeast. *Genetics*.  
757 191:347–387. doi: 10.1534/genetics.111.132886.
- 758 Brown JL, Jaquenoud M, Gulli MP, Chant J, Peter M. 1997. Novel Cdc42-binding proteins  
759 Gic1 and Gic2 control cell polarity in yeast. *Genes & Development*. 11:2972–2982.
- 760 Buchfink B, Xie C, Huson DH. 2014. Fast and sensitive protein alignment using DIAMOND.  
761 *Nat Meth*. 12:59–60. doi: 10.1093/nar/gkq275.
- 762 Buljan M, Bateman A. 2009. The evolution of protein domain families. *Biochim. Soc. Trans*.  
763 37:751–755. doi: 10.1042/BST0370751.
- 764 Butty A-C et al. 2002. A positive feedback loop stabilizes the guanine-nucleotide exchange  
765 factor Cdc24 at sites of polarization. *EMBO J*. 21:1565–1576. doi: 10.1093/emboj/21.7.1565.
- 766 Chang F, Peter M. 2003. Yeasts make their mark. *Nat Cell Biol*. 5:294–299. doi:  
767 10.1038/ncb0403-294.
- 768 Chant J. 1999. Cell polarity in yeast. *Annu. Rev. Cell Dev. Biol*. 15:365–391. doi:  
769 10.1146/annurev.cellbio.15.1.365.
- 770 Cherry JM et al. 2011. *Saccharomyces Genome Database: the genomics resource of budding*  
771 *yeast*. *Nucleic Acids Research*. 40:D700–D705. doi: 10.1093/nar/gkr1029.
- 772 Cisse OH, Stajich JE. FGMP: assessing fungal genome completeness and gene content. doi:  
773 10.1101/049619.
- 774 Coulombe-Huntington J, Xia Y. 2017. Network Centrality Analysis in Fungi Reveals  
775 Complex Regulation of Lost and Gained Genes. *PLoS ONE*. 12:e0169459. doi:  
776 10.1371/journal.pone.0169459.s001.
- 777 Dean RA et al. 2005. The genome sequence of the rice blast fungus *Magnaporthe grisea*.  
778 *Nature*. 434:980–986. doi: 10.1038/nature03449.
- 779 Diepeveen ET, Daalman WK-G, Laan L. Evolutionary dynamics in the fungal polarization  
780 network, a mechanistic perspective. *Biophysical Reviews*. under review.
- 781 Drees BL et al. 2001. A protein interaction map for cell polarity development. *Journal of Cell*  
782 *Biology*. 154:549–571. doi: 10.1083/jcb.200104057.
- 783 Drummond DA. 2005. A Single Determinant Dominates the Rate of Yeast Protein Evolution.  
784 *Molecular Biology and Evolution*. 23:327–337. doi: 10.1093/molbev/msj038.

- 785 Ebersberger I et al. 2012. A Consistent Phylogenetic Backbone for the Fungi. *Molecular*  
786 *Biology and Evolution*. 29:1319–1334. doi: 10.1093/molbev/msr285.
- 787 English AC et al. 2012. Mind the Gap: Upgrading Genomes with Pacific Biosciences RS  
788 Long-Read Sequencing Technology. *PLoS ONE*. 7:e47768. doi:  
789 10.1371/journal.pone.0047768.t003.
- 790 Etienne-Manneville S. 2004. Cdc42 - the centre of polarity. *Journal of Cell Science*.  
791 117:1291–1300. doi: 10.1242/jcs.01115.
- 792 Evlampiev K, Isambert H. 2008. Conservation and topology of protein interaction networks  
793 under duplication-divergence evolution. *Proc. Natl. Acad. Sci. U.S.A.* 105:9863–9868. doi:  
794 10.1073/pnas.0804119105.
- 795 Evlampiev K, Isambert H. 2007. Modeling protein network evolution under genome  
796 duplication and domain shuffling. *BMC Syst Biol*. 1:49. doi: 10.1186/1752-0509-1-49.
- 797 Fox J. 2005. The R commander: a basic-statistics graphical user interface to R. *J Stat Softw*.  
798 14. doi: 10.18637/jss.v014.i09.
- 799 Fox J. 2016. *Using the R Commander: A Point-and-Click Interface to R*. Chapman and  
800 Hall/CRC.
- 801 Fraser HB, Hirsh AE, Steinmetz LM, Scharfe C, Feldman MW. 2002. Evolutionary rate in the  
802 protein interaction network. *Science*. 296:750–752. doi: 10.1126/science.1068696.
- 803 Futuyma DJ. 2009. *Evolution*. Sinauer Associates, Sunderland, MA pp. 279–301.
- 804 Galagan JE, Henn MR, Ma L-J, Cuomo CA, Birren B. 2005. Genomics of the fungal  
805 kingdom: insights into eukaryotic biology. *Genome Research*. 15:1620–1631. doi:  
806 10.1101/gr.3767105.
- 807 Gauthier GM. 2015. Dimorphism in Fungal Pathogens of Mammals, Plants, and Insects.  
808 *PLoS Pathog*. 11:e1004608. doi: 10.1371/journal.ppat.1004608.t001.
- 809 Giaever G et al. 2002. Functional profiling of the *Saccharomyces cerevisiae* genome. *Nature*.  
810 418:387–391. doi: 10.1038/nature00935.
- 811 Gladieux P et al. 2014. Fungal evolutionary genomics provides insight into the mechanisms  
812 of adaptive divergence in eukaryotes. *Molecular Ecology*. 23:753–773. doi:  
813 10.1111/mec.12631.
- 814 Goryachev AB, Pokhilko AV. 2008. Dynamics of Cdc42 network embodies a Turing-type  
815 mechanism of yeast cell polarity. *FEBS Letters*. 582:1437–1443. doi:  
816 10.1016/j.febslet.2008.03.029.
- 817 Habib N, Wapinski I, Margalit H, Regev A, Friedman N. 2012. A functional selection model  
818 explains evolutionary robustness despite plasticity in regulatory networks. *Molecular Systems*  
819 *Biology*. 8:619. doi: 10.1038/msb.2012.50.
- 820 Haldane JBS. 1927. A mathematical theory of natural and artificial selection, Part V:  
821 Selection and Mutation. *Mathematical Proceedings of the Cambridge Philosophical Society*.

- 822 23:838–844. doi: 10.1017/S0305004100015644.
- 823 Hibbett DS et al. 2007. A higher-level phylogenetic classification of the Fungi. *Mycological*  
824 *Research*. 111:509–547. doi: 10.1016/j.mycres.2007.03.004.
- 825 Hirsh AE, Fraser HB. 2001. Protein dispensability and rate of evolution. *Nature*. 411:1046–  
826 1049. doi: 10.1038/35082561.
- 827 Huynen MA, Dandekar T, Bork P. 1999. Variation and evolution of the citric-acid cycle: a  
828 genomic perspective. *Trends Microbiol*. 7:281–291.
- 829 Irazoqui JE, Gladfelter AS, Lew DJ. 2003. Scaffold-mediated symmetry breaking by Cdc42p.  
830 *Nat Cell Biol*. 5:1062–1070. doi: 10.1083/jcb.142.5.1301.
- 831 Jackson DA. 1993. Stopping Rules in Principal Components Analysis: a Comparison of  
832 Heuristic and Statistical Approaches. *Ecology*. 74:2204–2214. doi: 10.2307/1939574.
- 833 Johnson DI. 1999. Cdc42: an essential Rho-type GTPase controlling eukaryotic cell polarity.  
834 *Microbiology and Molecular Biology Reviews*. 63:54–105.
- 835 Jones DT, Taylor WR, Thornton JM. 1992. The rapid generation of mutation data matrices  
836 from protein sequences. *Comput. Appl. Biosci*. 8:275–282.
- 837 Jordan IK, Wolf YI, Koonin EV. 2003. No simple dependence between protein evolution rate  
838 and the number of protein-protein interactions: only the most prolific interactors tend to  
839 evolve slowly. *BMC Evolutionary Biology*. 3:1.
- 840 Kellis M, Birren BW, Lander ES. 2004. Proof and evolutionary analysis of ancient genome  
841 duplication in the yeast *Saccharomyces cerevisiae*. *Nature*. 428:617–24. doi:  
842 10.1038/nature02424.
- 843 Kersey PJ et al. 2016. Ensembl Genomes 2016: more genomes, more complexity. *Nucleic*  
844 *Acids Research*. 44:D574–D580. doi: 10.1093/nar/gkv1209.
- 845 Kim PM, Lu LJ, Xia Y, Gerstein MB. 2006. Relating three-dimensional structures to protein  
846 networks provides evolutionary insights. *Science*. 314:1938–1941. doi:  
847 10.1126/science.1136174.
- 848 Kimura M. 1967. On the evolutionary adjustment of spontaneous mutation rates. *Genet. Res*.  
849 9:23–34. doi: 10.1017/S0016672300010284.
- 850 Kulak NA, Pichler G, Paron I, Nagaraj N, Mann M. 2014. Minimal, encapsulated proteomic-  
851 sample processing applied to copy-number estimation in eukaryotic cells. *Nat Meth*. 11:319–  
852 324. doi: 10.1038/nmeth.2834.
- 853 Kumar S, Stecher G, Tamura K. 2016. MEGA7: Molecular Evolutionary Genetics Analysis  
854 Version 7.0 for Bigger Datasets. *Molecular Biology and Evolution*. 33:1870–1874. doi:  
855 10.1093/molbev/msw054.
- 856 Laan L, Koschwanetz JH, Murray AW. 2015. Evolutionary adaptation after crippling cell  
857 polarization follows reproducible trajectories. *Elife*. 4. doi: 10.7554/eLife.09638.

- 858 Leinonen R et al. 2010. The European Nucleotide Archive. *Nucleic Acids Research*. 39:D28–  
859 D31. doi: 10.1093/nar/gkq967.
- 860 Lê S, Josse J, Husson F. 2008. FactoMineR: an R package for multivariate analysis. *J. Stat.*  
861 *Soft.* 25. doi: 10.18637/jss.v025.i01.
- 862 Liang Z, Xu M, Teng M, Niu L. 2006. Comparison of protein interaction network reveals  
863 species conservation and divergence. *BMC Bioinformatics*. 7:457. doi: 10.1186/1471-2105-7-  
864 457.
- 865 Liu G et al. 2015. Gene Essentiality Is a Quantitative Property Linked to Cellular  
866 Evolvability. *Cell*. 163:1388–1399. doi: 10.1016/j.cell.2015.10.069.
- 867 Lucking R, Huhndorf S, Pfister DH, Plata ER, Lumbsch HT. 2009. Fungi evolved right on  
868 track. *Mycologia*. 101:810–822. doi: 10.3852/09-016.
- 869 Madhani H. 2007. *From a to alpha: Yeast as a Model for Cellular Differentiation*. Cold  
870 Spring Harbor Laboratory Press.
- 871 Martin SG. 2015. Spontaneous cell polarization: Feedback control of Cdc42 GTPase breaks  
872 cellular symmetry. *Bioessays*. 37:1193–1201. doi: 10.1002/bies.201500077.
- 873 Martin SG, Arkowitz RA. 2014. Cell polarization in budding and fission yeasts. *FEMS*  
874 *Microbiol Rev*. 38:228–253. doi: 10.1111/1574-6976.12055.
- 875 Masel J. 2011. Genetic drift. *Curr. Biol*. 21:R837–R838. doi: 10.1016/j.cub.2011.08.007.
- 876 Matheny PB, Gossmann JA, Zalar P, Kumar TKA, Hibbett DS. 2006. Resolving the  
877 phylogenetic position of the Wallemiomycetes: an enigmatic major lineage of Basidiomycota.  
878 *Can. J. Bot*. 84:1794–1805. doi: 10.1139/b06-128.
- 879 Miranda-Saavedra D et al. 2007. The complement of protein kinases of the microsporidium  
880 *Encephalitozoon cuniculi* in relation to those of *Saccharomyces cerevisiae* and  
881 *Schizosaccharomyces pombe*. *BMC Genomics*. 8:309. doi: 10.1186/1471-2164-8-309.
- 882 Mody A, Weiner J, Ramanathan S. 2009. Modularity of MAP kinases allows deformation of  
883 their signalling pathways. *Nat Cell Biol*. 11:484–491. doi: 10.1038/ncb1856.
- 884 Mueller GM, Schmit JP. 2007. Fungal biodiversity: what do we know? What can we predict?  
885 *Biodivers Conserv*. 16:1–5. doi: 10.1007/s10531-006-9117-7.
- 886 Muñoz A, Santos Muñoz D, Zimin A, Yorke JA. 2016. Evolution of transcriptional networks  
887 in yeast: alternative teams of transcriptional factors for different species. *BMC Genomics*.  
888 17:826. doi: 10.1186/s12864-016-3102-7.
- 889 Nagy LG et al. 2014. Latent homology and convergent regulatory evolution underlies the  
890 repeated emergence of yeasts. *Nature Communications*. 5:4471. doi: 10.1038/ncomms5471.
- 891 Neumann RS, Kumar S, Shalchian-Tabriz K. 2014. BLAST output visualization in the new  
892 sequencing era. *Brief Bioinf*. 15:484–503. doi: 10.1093/bib/bbt009.
- 893 O'Brien HE, Parrent JL, Jackson JA, Moncalvo JM, Vilgalys R. 2005. Fungal Community

- 894 Analysis by Large-Scale Sequencing of Environmental Samples. *Applied and Environmental*  
895 *Microbiology*. 71:5544–5550. doi: 10.1128/AEM.71.9.5544-5550.2005.
- 896 Orr HA. 2005. The genetic theory of adaptation: a brief history. *Nat Rev Genet*. 6:119–127.  
897 doi: 10.1038/nrg1523.
- 898 Padamsee M et al. 2012. The genome of the xerotolerant mold *Wallemia sebi* reveals  
899 adaptations to osmotic stress and suggests cryptic sexual reproduction. *Fungal Genetics and*  
900 *Biology*. 49:217–226. doi: 10.1016/j.fgb.2012.01.007.
- 901 Papin JA, Hunter T, Palsson BO, Subramaniam S. 2005. Reconstruction of cellular signalling  
902 networks and analysis of their properties. *Nat Rev Mol Cell Biol*. 6:99–111. doi:  
903 10.1038/nrm1570.
- 904 Park HO, Bi E. 2007. Central Roles of Small GTPases in the Development of Cell Polarity in  
905 Yeast and Beyond. *Microbiology and Molecular Biology Reviews*. 71:48–96. doi:  
906 10.1128/MMBR.00028-06.
- 907 Pawson T, Nash P. 2003. Assembly of cell regulatory systems through protein interaction  
908 domains. *Science*. 300:445–452. doi: 10.1126/science.1083653.
- 909 Pál C, Papp B, Lercher MJ. 2006. An integrated view of protein evolution. *Nat Rev Genet*.  
910 7:337–348. doi: 10.1038/nrg1838.
- 911 Peyretailade E et al. 2011. Extreme reduction and compaction of microsporidian genomes.  
912 *Research in Microbiology*. 162:598–606. doi: 10.1016/j.resmic.2011.03.004.
- 913 Price MN, Dehal PS, Arkin AP. 2009. FastTree: Computing Large Minimum Evolution Trees  
914 with Profiles instead of a Distance Matrix. *Molecular Biology and Evolution*. 26:1641–1650.  
915 doi: 10.1093/molbev/msp077.
- 916 Pruyne D, Bretscher A. 2000. Polarization of cell growth in yeast. I. Establishment and  
917 maintenance of polarity states. *Journal of Cell Science*. 113:365–375.
- 918 Pruyne D, Legesse-Miller A, Gao L, Dong Y, Bretscher A. 2004. Mechanisms of polarized  
919 growth and organelle segregation in yeast. *Annu. Rev. Cell Dev. Biol*. 20:559–591. doi:  
920 10.1146/annurev.cellbio.20.010403.103108.
- 921 Rhind N et al. 2011. Comparative Functional Genomics of the Fission Yeasts. *Science*.  
922 332:930–936. doi: 10.1126/science.1203357.
- 923 Richman TJ et al. 2004. Analysis of cell-cycle specific localization of the Rdi1p RhoGDI and  
924 the structural determinants required for Cdc42p membrane localization and clustering at sites  
925 of polarized growth. *Current Genetics*. 45:339–349. doi: 10.1007/s00294-004-0505-9.
- 926 R Core Team. 2014. *R: A language and environment for statistical computing*. R Foundation  
927 for Statistical Computing: Vienna, Austria <http://www.R-project.org/>.
- 928 Schoch CL et al. 2009. The Ascomycota Tree of Life: A Phylum-wide Phylogeny Clarifies  
929 the Origin and Evolution of Fundamental Reproductive and Ecological Traits. *Systematic*  
930 *Biology*. 58:224–239. doi: 10.1093/sysbio/syp020.

- 931 Schüler A, Bornberg-Bauer E. 2010. The Evolution of Protein Interaction Networks. In:  
932 Methods in Molecular Biology Vol. 696 Humana Press: Totowa, NJ pp. 273–289. doi:  
933 10.1007/978-1-60761-987-1\_17.
- 934 Sharma KK. 2016. Fungal genome sequencing: basic biology to biotechnology. Critical  
935 Reviews in Biotechnology. 36:743–59. doi: 10.1186/1471-2164-14-274.
- 936 Shen XX et al. 2016. Reconstructing the backbone of the Saccharomycotina yeast phylogeny  
937 using genome-scale data. G3: Genes|Genomes|Genetics. 6:3927–3939. doi:  
938 10.1543/g3.116.034744.
- 939 Sievers F et al. 2011. Fast, scalable generation of high-quality protein multiple sequence  
940 alignments using Clustal Omega. Molecular Systems Biology. 7:539. doi:  
941 10.1038/msb.2011.75.
- 942 Stajich JE et al. 2011. FungiDB: an integrated functional genomics database for fungi.  
943 Nucleic Acids Research. 40:D675–D681. doi: 10.1093/nar/gkr918.
- 944 Tanay A, Regev A, Shamir R. 2005. Conservation and evolvability in regulatory networks:  
945 The evolution of ribosomal regulation in yeast. Proc. Natl. Acad. Sci. U.S.A. 102:7203–7208.  
946 doi: 10.1073/pnas.0502521102.
- 947 Tuch BB, Galgoczy DJ, Hernday AD, Li H, Johnson AD. 2008. The evolution of  
948 combinatorial gene regulation in fungi. Plos Biol. 6:352–364. doi:  
949 10.1371/journal.pbio.0060038.
- 950 Vivarès CP, Gouy M, Thomarat F, Méténier G. 2002. Functional and evolutionary analysis of  
951 a eukaryotic parasitic genome. Current Opinion in Microbiology. 5:499–505.
- 952 Vleugel M, Hoogendoorn E, Snel B, Kops GJPL. 2012. Evolution and Function of the Mitotic  
953 Checkpoint. Developmental Cell. 23:239–250. doi: 10.1016/j.devcel.2012.06.013.
- 954 Voordeckers K, Pougach K, Verstrepen KJ. 2015. How do regulatory networks evolve and  
955 expand throughout evolution? Current Opinion in Biotechnology. 34:180–188. doi:  
956 10.1016/j.copbio.2015.02.001.
- 957 Wall DP et al. 2005. Functional genomic analysis of the rates of protein evolution. Proc. Natl.  
958 Acad. Sci. U.S.A. 102:5483–5488. doi: 10.1073/pnas.0501761102.
- 959 Wedlich-Soldner R, Altschuler S, Wu L, Li R. 2003. Spontaneous cell polarization through  
960 actomyosin-based delivery of the Cdc42 GTPase. Science. 299:1231–1235. doi:  
961 10.1126/science.1080944.
- 962 Wolfe KH, Shields DC. 1997. Molecular evidence for an ancient duplication of the entire  
963 yeast genome. Nature. 387:708–713. doi: 10.1038/42711.
- 964 Zalar P, Sybren de Hoog G, Schroers H-J, Frank JM, Gunde-Cimerman N. 2005. Taxonomy  
965 and phylogeny of the xerophilic genus *Wallemia* (Wallemiomycetes and Wallemiales, cl. et  
966 ord. nov.). Antonie Van Leeuwenhoek. 87:311–328. doi: 10.1007/s10482-004-6783-x.
- 967 Zhang J, Yang J-R. 2015. Determinants of the rate of protein sequence evolution. Nat Rev  
968 Genet. 16:409–420. doi: 10.1038/nrg3950.

969 Zmasek CM, Godzik A. 2011. Strong functional patterns in the evolution of eukaryotic  
970 genomes revealed by the reconstruction of ancestral protein domain repertoires. *Genome Biol.*  
971 12:R4. doi: 10.1186/gb-2011-12-1-r4.

972





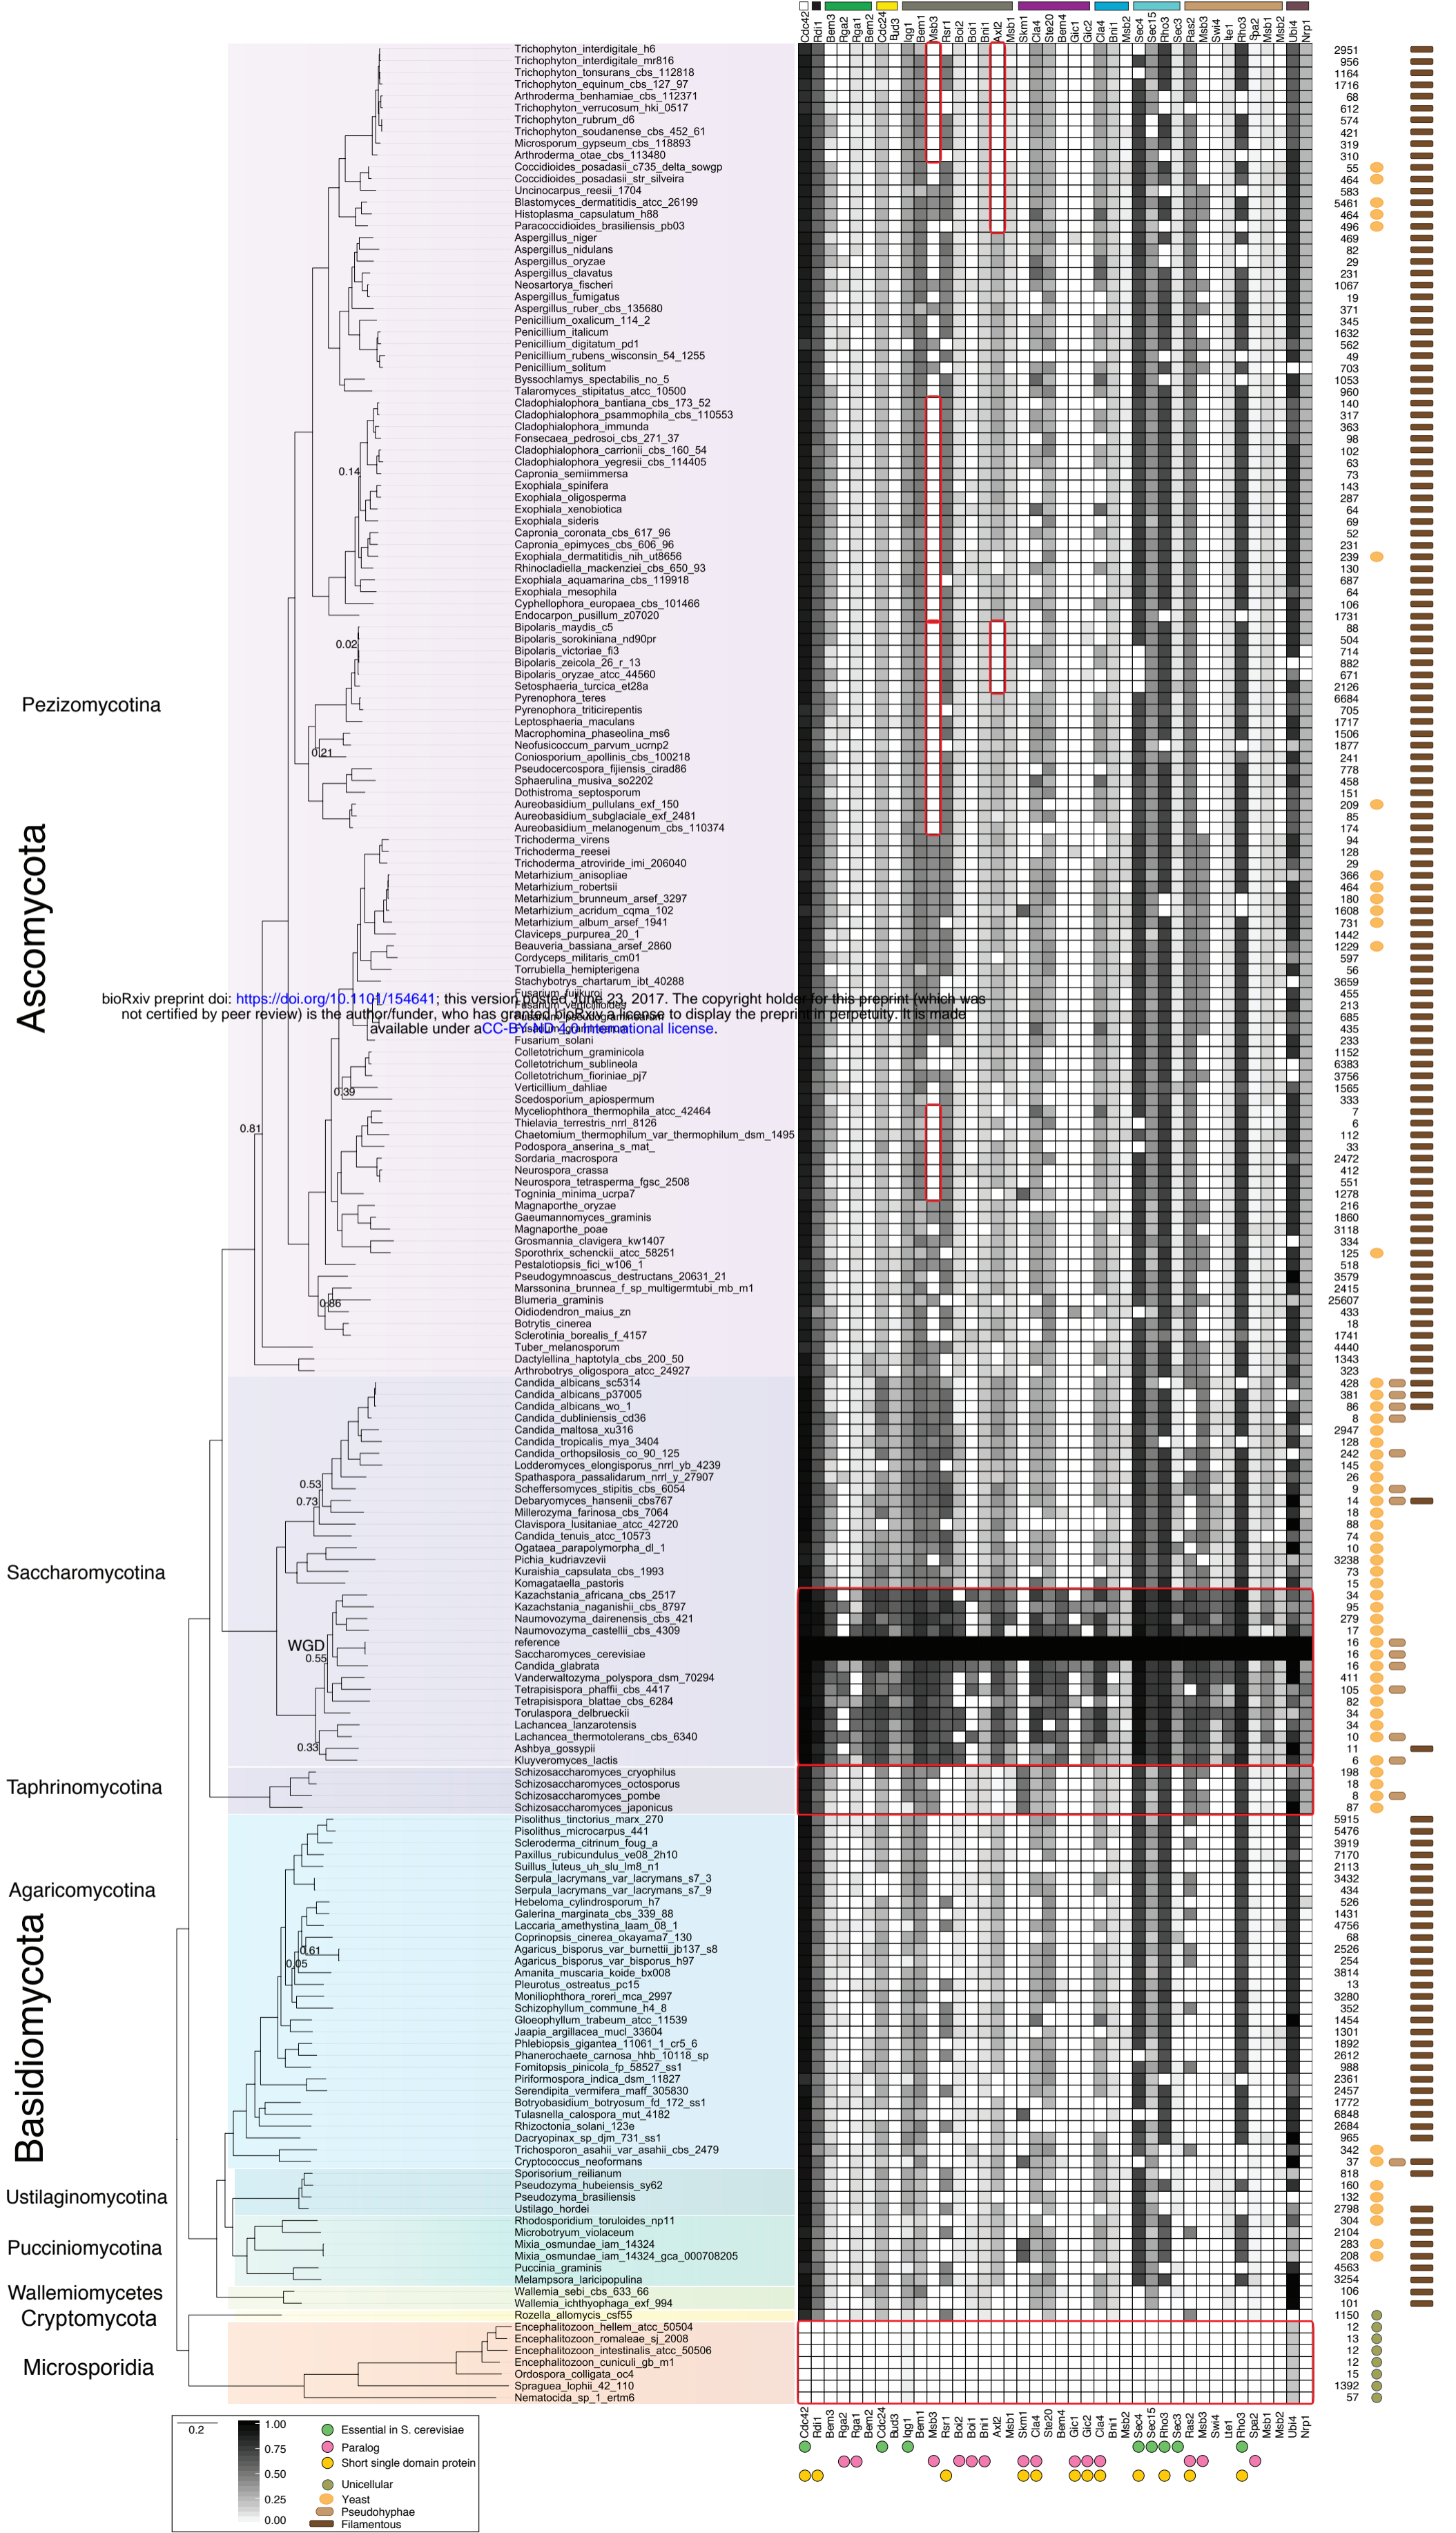

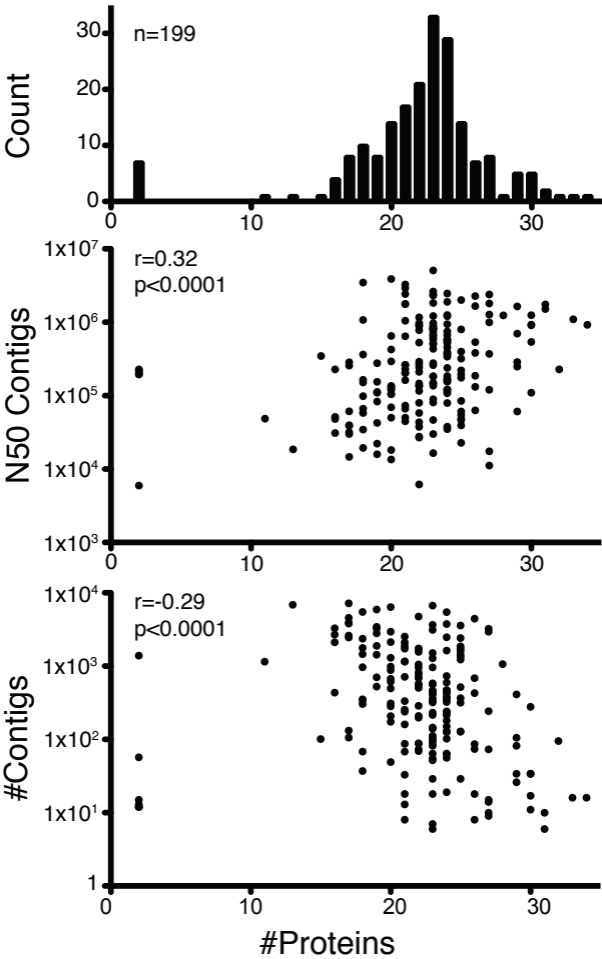

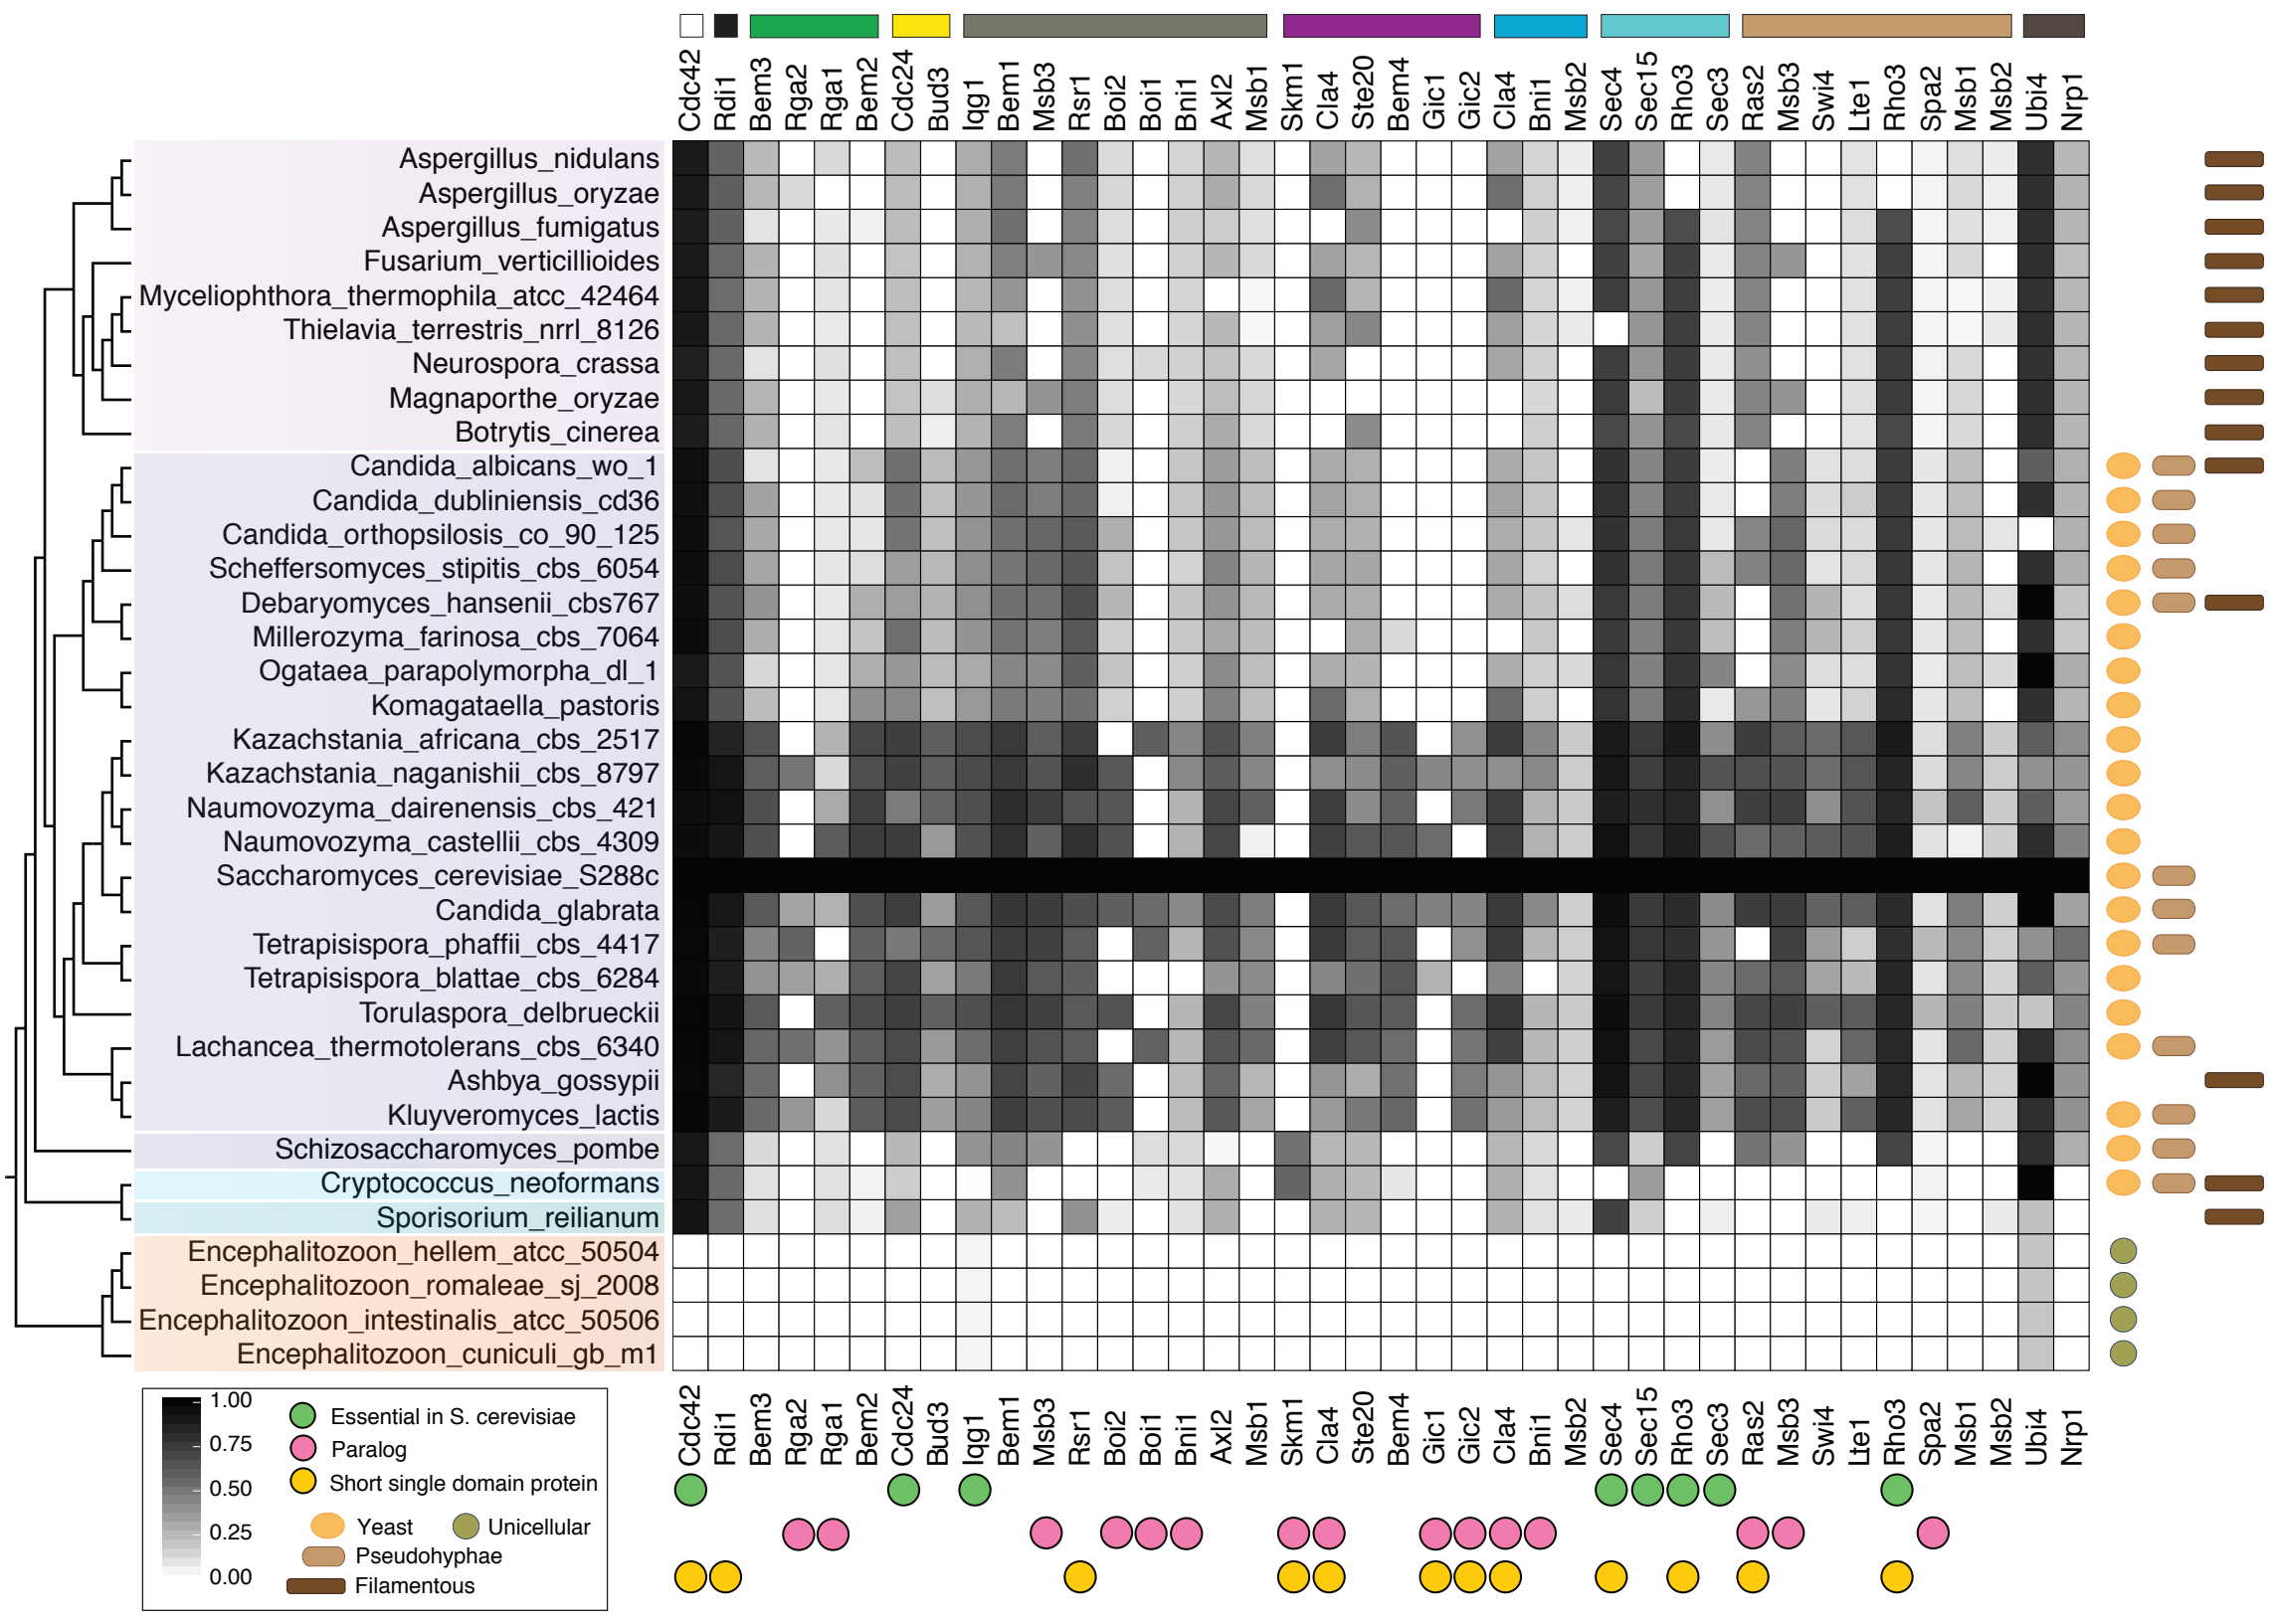

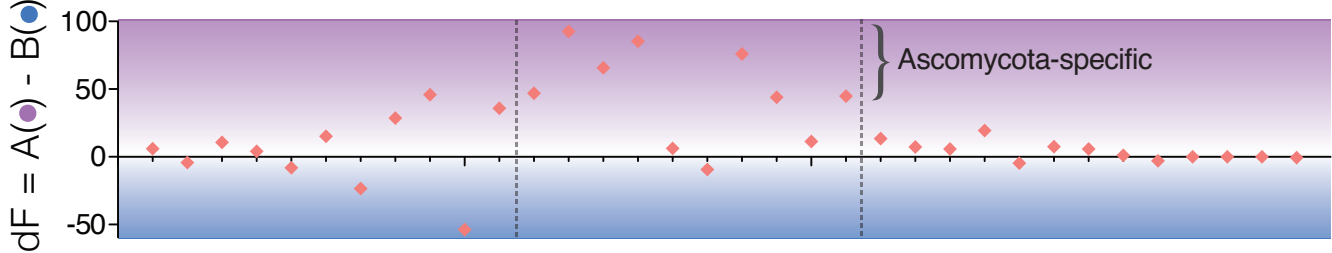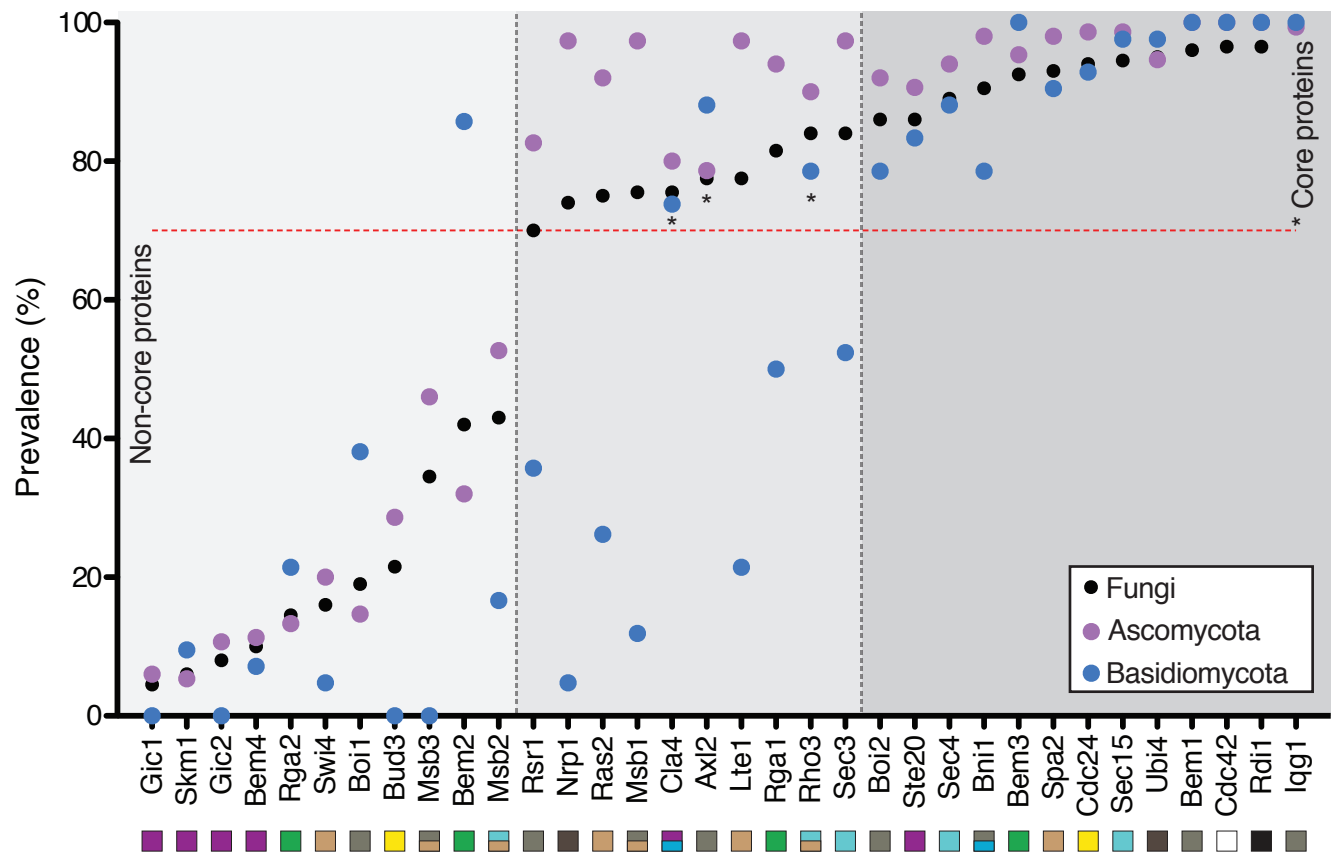



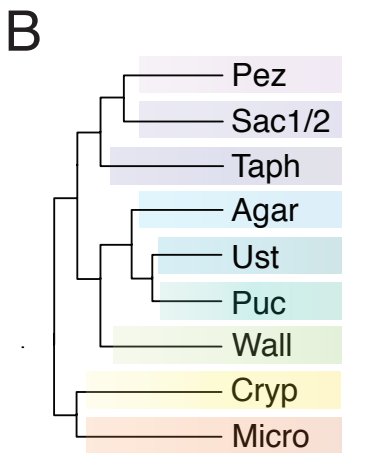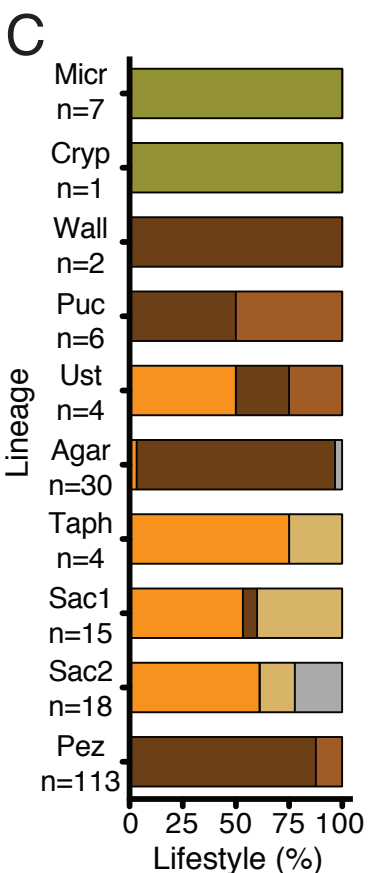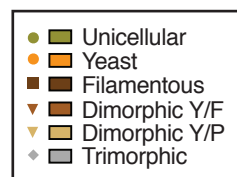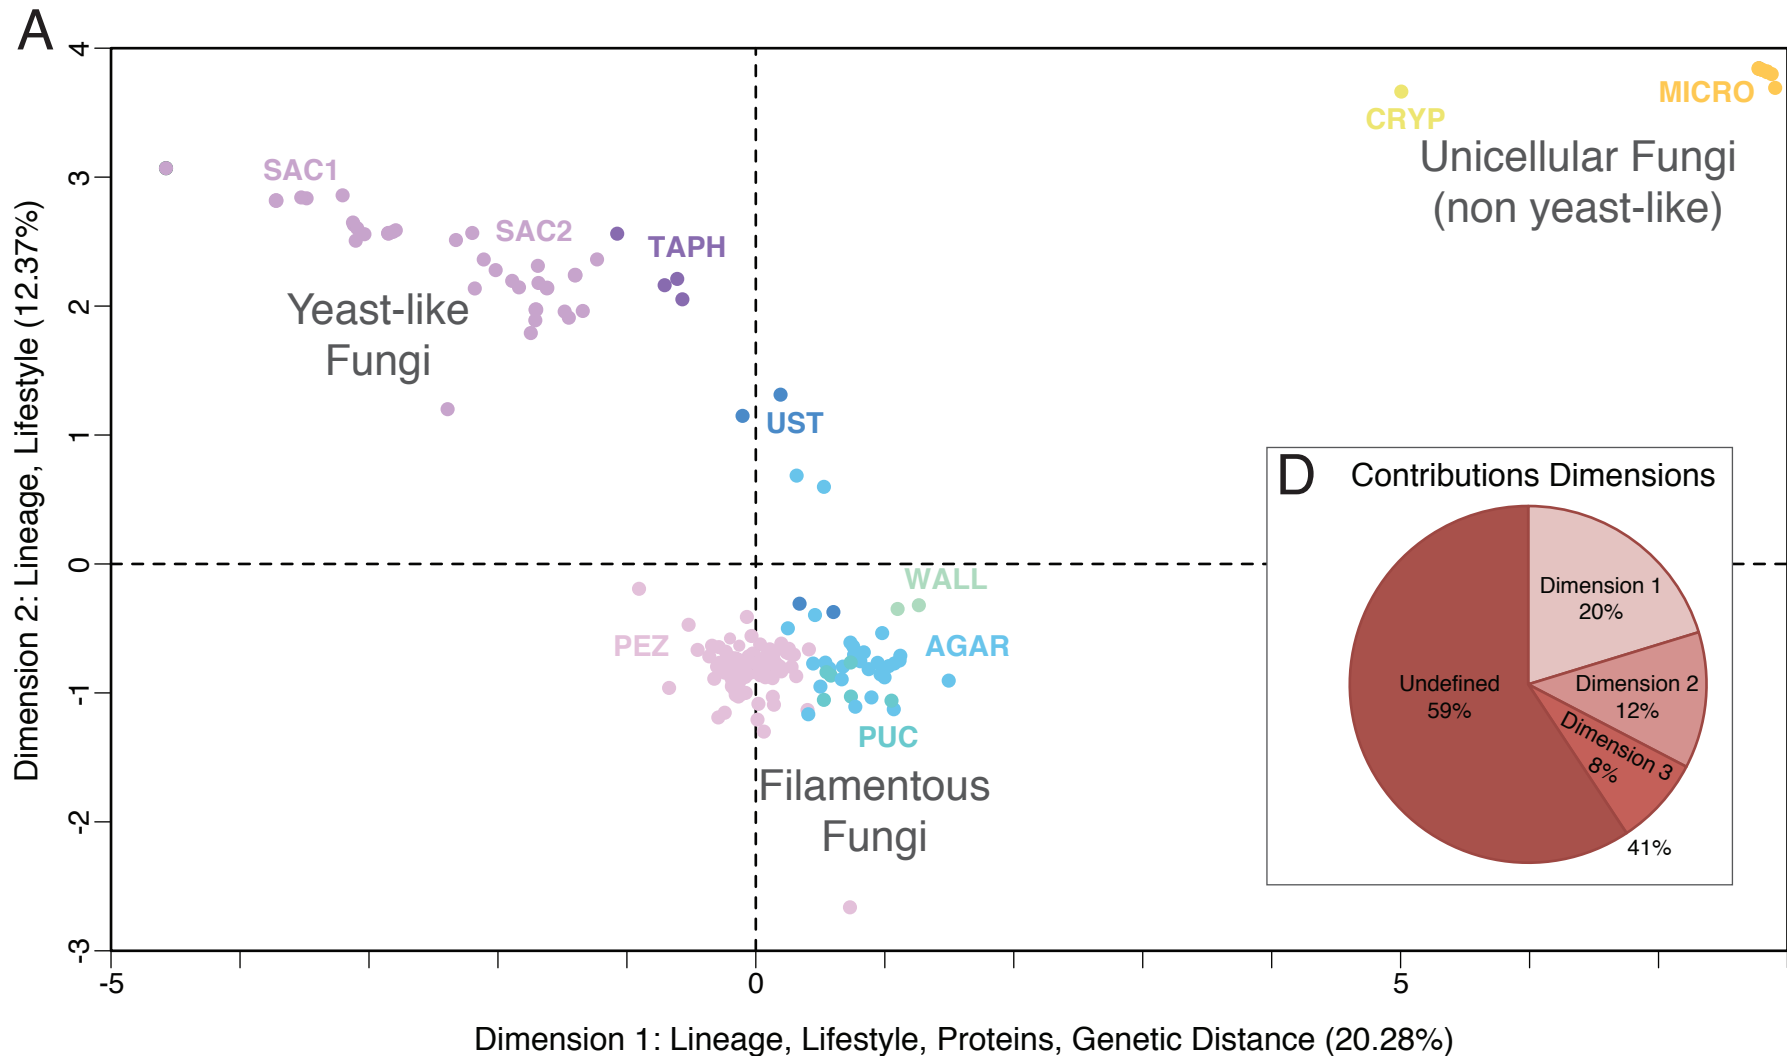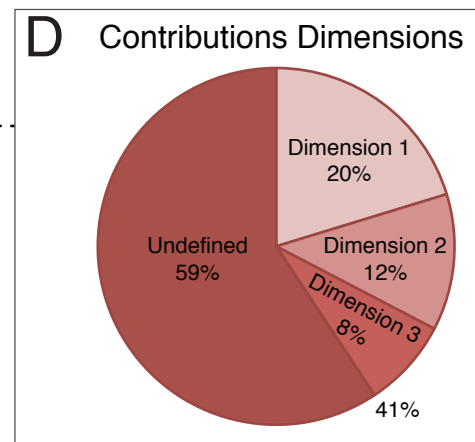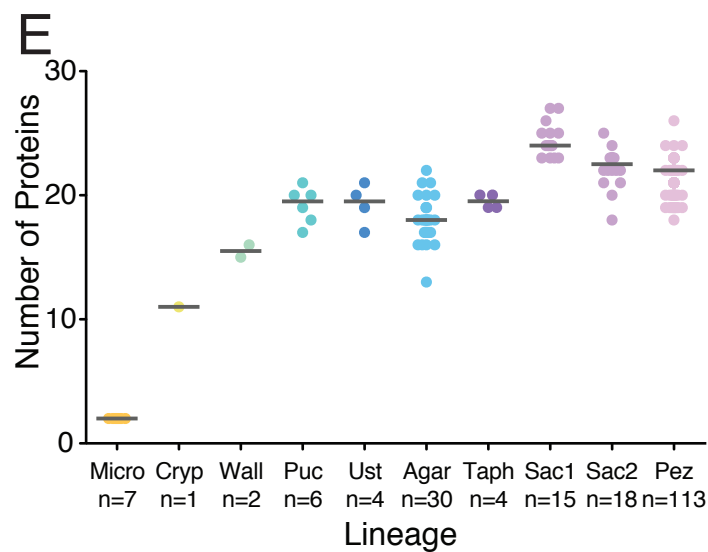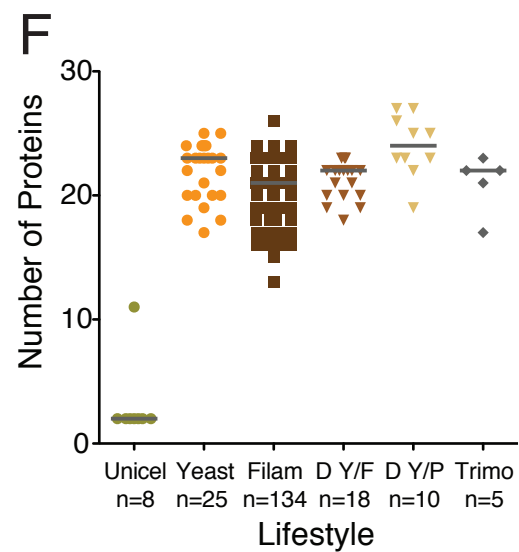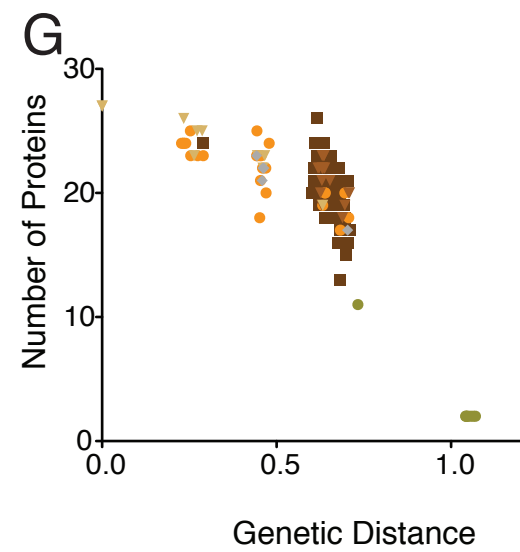

Source: http://biorxiv.org/content/10.1101/154641v1.full.pdf
